# Supplementary material for: Spatial Patterns of Sandy Beaches in China and Risk Analysis of Human Infrastructure Squeeze Based on Multi-Source Data and Ensemble Learning
Source: Copernicus journal article supplement (doi:10.5194/essd-2025-264), 2025-06-24
Supplement: Supplementary file [file essd-2025-264-RC1-supplement.pdf]

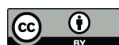

# Spatial Patterns of Sandy Beaches in China and Risk Analysis of Human Infrastructure Squeeze Based on Multi-Source Data and Ensemble Learning

Jie Meng<sup>1,2</sup>, Duanyang Xu<sup>1</sup>, Zexing Tao<sup>1</sup>, Quansheng Ge<sup>1</sup>

<sup>1</sup>Key Laboratory of Land Surface Pattern and Simulation, Institute of Geographic Sciences and National Resources Research, Chinese Academy of Science, Beijing 100101, China  
<sup>2</sup>University of Chinese Academy of Sciences, Beijing 100049, China

Correspondence to: Duanyang Xu (Xudy@igsrr.ac.cn)

**Abstract.** Sandy beaches provide essential ecological and economic services, but their functions are increasingly threatened by human activities. Analyzing the spatial distribution of China's sandy beaches and the impacts of human activities offers valuable insights for coastal resource management and ecological protection. However, remote sensing technologies face challenges such as limited data sources and tidal influences, which affect recognition accuracy. Therefore, integrating multi-source remote sensing data and reducing the impact of tidal fluctuations to improve recognition accuracy remains a key challenge. This study proposes an innovative approach utilizing multi-source data and an ensemble learning model to identify sandy beaches in China (2016–2023). By integrating Sentinel-1/2 satellite data, terrain data, and nighttime light data, along with spectral, terrain, texture, and polarization features, sandy beaches were identified across multiple years, and the results were consolidated into a single-year dataset to analyze spatial patterns and risks from human infrastructure squeeze. (1) High-precision classification identified 2984 sandy beaches in China, covering a total area of 260.70 km<sup>2</sup>. Guangdong had the largest number, area, and perimeter, while Shanghai had the widest sandy beaches. (2) In Fujian, Guangdong, and Taiwan, the identified sandy beaches covered 149.68 km<sup>2</sup>, with perimeters of 5155.91 km and widths of 49.50 m, 32.83 m, and 50.70 m, respectively. These results were significantly better than those from reference datasets. (3) From 1990 to 2023, the area at risk from human infrastructure squeeze increased from 109.95 km<sup>2</sup> to 245.58 km<sup>2</sup>, a rise of 135.63 km<sup>2</sup>, with the most significant increase occurring between 1990 and 2000. Guangdong and Fujian showed growth rates of 1.05 km<sup>2</sup>/year and 0.73 km<sup>2</sup>/year, respectively. This study provides an up-to-date dataset on China's sandy beaches. It assesses their spatial patterns and human impact risks, contributing to research and policy for the sustainable development of coastal zones (<https://doi.org/10.5281/zenodo.15307240>, Meng et al., 2025).

## 1 Introduction

As transitional zones between land and sea, sandy beaches play a critical ecological role, providing essential habitats for various flora and fauna and offering crucial ecosystem services such as climate regulation, wave attenuation, and storm surge

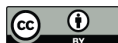

30 protection (Temmerman et al., 2013; Lansu et al., 2024; Mentaschi et al., 2018). Moreover, sandy beaches support a wide range of economic activities including tourism, fisheries, marine resource development, and land use, thereby holding considerable economic value (Mejjad et al., 2022; Bršćić et al., 2020; Ranasinghe et al., 2016). However, with the development of coastal areas, sandy beach ecosystems are increasingly threatened by human activities. Urban expansion, pollution, and tourism-related disturbances have transformed many natural sandy beaches into residential, commercial, or industrial land, 35 leading to habitat degradation and the loss of ecological functions (Lu et al., 2018; Barbier et al., 2011). Therefore, accurate identification and mapping of sandy beach areas are essential for ecological conservation, resource management, and sustainable coastal development.

Efficient and precise identification of sandy beach areas is a core component of sandy beach research (Ponte et al., 2016). Traditional field-based surveys, while offering high accuracy, are often constrained by high labor costs, low efficiency, and 40 environmental limitations (Rodríguez-Padilla et al., 2024; Valderrama-Landeros et al., 2022). In contrast, remote sensing technologies based on satellites, **unmanned** aerial vehicles (UAVs), or aerial platforms, with their high temporal resolution and broad spatial coverage, enable effective data acquisition across different regions and climatic conditions and thus have become the primary method for large-area sandy beach identification (Xu et al., 2024; Sun et al., 2024; Salameh et al., 2024; Nativí-Merchán et al., 2024; Splinter et al., 2018). Current remote sensing-based sandy beach identification methods are generally 45 categorized into visual interpretation and automated classification (Sekovski et al., 2014; Toure et al., 2019). While visual interpretation relies heavily on expert experience and high-quality imagery, it is susceptible to tidal variations and subjectivity, making it unsuitable for large-area or long-term monitoring. Automated classification methods, on the other hand, extract features such as spectral and texture information to achieve more consistent and efficient identification, gradually becoming the mainstream approach in remote sensing-based sandy beach studies. These methods are particularly suited for large-area 50 monitoring, providing efficient and accurate results over extensive areas (Masria et al., 2024; Yasir et al., 2020; Wei et al., 2021).

Currently, remote sensing-based automated sandy beach recognition methods encompass a variety of **technologies**, including threshold segmentation, machine learning methods, and deep learning methods (Sekar et al., 2020; Vicens-Miquel et al., 2022; Rabehi et al., 2021). Threshold segmentation divides the image into sandy beach and non-sandy beach areas by analyzing pixel 55 value thresholds of remote sensing images. This method is simple and efficient, but the segmentation performance is often poor in complex backgrounds or areas with subtle **grayscale differences** (Bao et al., 2018). Machine learning and deep learning methods are similar in principle, as both build classification models through training datasets, enabling them to handle complex images and exhibit strong pattern recognition capabilities. Machine learning methods typically require integrating multiple features from remote sensing images, such as spectral, spatial, and texture information, while deep learning methods 60 automatically extract features and perform classification using multi-layer neural networks, capable of handling large-scale and complex datasets. For example, **Latella et al.** conducted a **rough** survey and monitoring of sandy beaches by comparing Sentinel-2 and Landsat images, using **random** forests and various spectral indices (Latella et al., 2021); while **Yong et al.** used a binary image segmentation method based on the U-Net model in convolutional neural networks to accurately delineate the

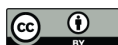

sandy beach outline of the southeastern coast of Australia (Yong et al., 2024). Despite significant progress in improving  
65 recognition accuracy and spatial scalability, machine learning and deep learning methods still face several challenges under  
complex conditions and tidal interference. Specifically, due to the single spectral feature of optical imagery, the recognition  
accuracy of machine learning methods still needs improvement in certain situations, particularly in areas where feature  
boundaries are unclear or the background is complex. For deep learning methods, the influence of tidal variations remains a  
significant challenge. To overcome **tidal image interference**, multi-year data needs to be introduced, which requires a large  
70 amount of labeled data for training. However, high-quality labeled data **is** often difficult to obtain, and the training process is  
time-consuming, increasing computational resource consumption. Moreover, during the training of multi-layer neural  
networks, overfitting may also become an issue (Zhu et al., 2023; Chen et al., 2018; Zhou et al., 2023; Wang et al., 2024).  
The coastal regions of China are among the most economically developed and dynamic areas in the country, encompassing  
several key economic belts and contributing **over 57%** of the national gross income (Tian et al., 2016; Wang et al., 2024; Feng  
75 et al., 2025). These areas not only have a solid industrial foundation, vibrant trade, and advanced service sectors but also serve  
as the core engines of national economic growth. However, despite the rapid economic development in these regions, there is  
a lack of nationwide dynamic monitoring tools for sandy beaches, and the risks posed by **human infrastructure squeeze** are not  
well understood. Past research has mainly relied on single optical imagery data and has not fully considered the use of multi-  
year data to address tidal changes, which limits the comprehensive understanding and monitoring of coastal beach changes.  
80 To address these challenges, this study is divided into two main components: (1) This study proposes a novel method for sandy  
beach identification using multi-source remote sensing and ensemble learning. Sentinel-1/2 imagery, nighttime light, and  
terrain data are integrated to extract spectral, terrain, polarization, and texture features. A stacking ensemble framework  
enhances classification accuracy and robustness. Multi-temporal data from 2016 to 2023 are used to build an **annual**  
**representative beach dataset**, reducing tidal fluctuation impacts and supporting precise mapping and monitoring; (2) Based on  
85 this dataset, buffer zones are created and combined with human infrastructure data to identify areas at risk of encroachment.  
Spatial analysis evaluates anthropogenic pressure on beaches across regions. The results offer a scientific basis for delineating  
ecological red lines and inform strategies for beach conservation and coastal zone management.

## 2 Study area and materials

### 2.1 Study area

90 To identify sandy beaches along China's coast from 2016 to 2023, this study adopts the 2023 coastline of China as the baseline.  
A buffer zone extending 10 km inland and 20 km offshore is applied to **ensure the integrity** of the sandy beach area (Li et al.,  
2022). The study area spans from 107°54'E to 124°21'E longitude and from 17°58'N to 41°8'N latitude, encompassing 14  
regions (Liaoning, Hebei, Shandong, Jiangsu, Zhejiang, Fujian, Guangdong, Hainan, Taiwan, Guangxi, Tianjin, Shanghai,  
Hong Kong, and Macao) (Fig. 1). For statistical convenience, the coastal regions of Hong Kong and Macao are included within  
95 the Guangdong coastal region.

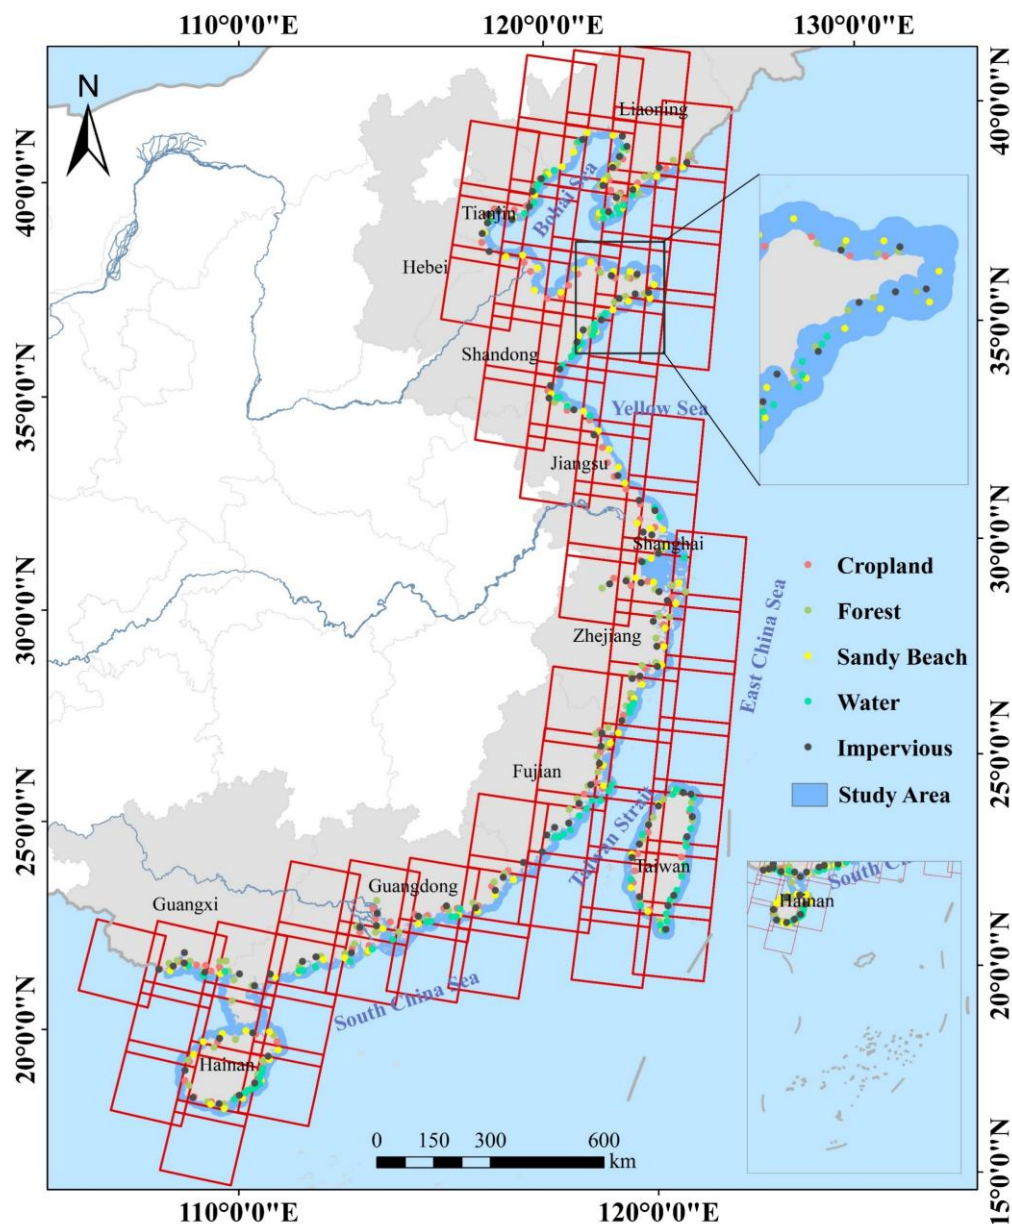

Figure 1: Location of China's coastal zone and distribution of **partial test points** for **result** verification.

## 2.2 Remote sensing data

This study used Sentinel-1, Sentinel-2, and Google Earth imagery, with data collected from January 1, 2016, to December 31, 2023. The Sentinel-1 images are Level-1 Ground Range Detected (GRD) products, acquired in Interferometric Wide (IW) mode, including dual-polarization VV (vertical transmit, vertical receive) and VH (vertical transmit, horizontal receive) data

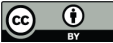

(Tian et al., 2022). A total of 14,710 Sentinel-1A images were selected, and annual mean composites were generated for each polarization channel (Fig. 2a). For Sentinel-2, five spectral bands were used: four visible and near-infrared bands (Bands 2, 3, 4, and 8) with a resolution of 10 m, and one shortwave infrared band (Band 11) with a resolution of 20 m. A total of 29,757 L2A and L1C images were selected, with cloud cover below 20% (Fig. 2b) (Li et al., 2022). After atmospheric correction, the QA60 quality band was applied to remove clouds and cloud shadows. Since atmospheric correction is not essential for applications not involving complex spectral analysis, L1C images were used for years lacking L2A data (Wang et al., 2023). Finally, cloud-free median composites were generated and resampled to a 10 m resolution. Google Earth imagery was sourced from the "Google Earth Engine" plugin and online map services on the QGIS platform, with a spatial resolution of 1 to 5 m, enabling clear visualization of beach areas with high geographical accuracy and temporal consistency.

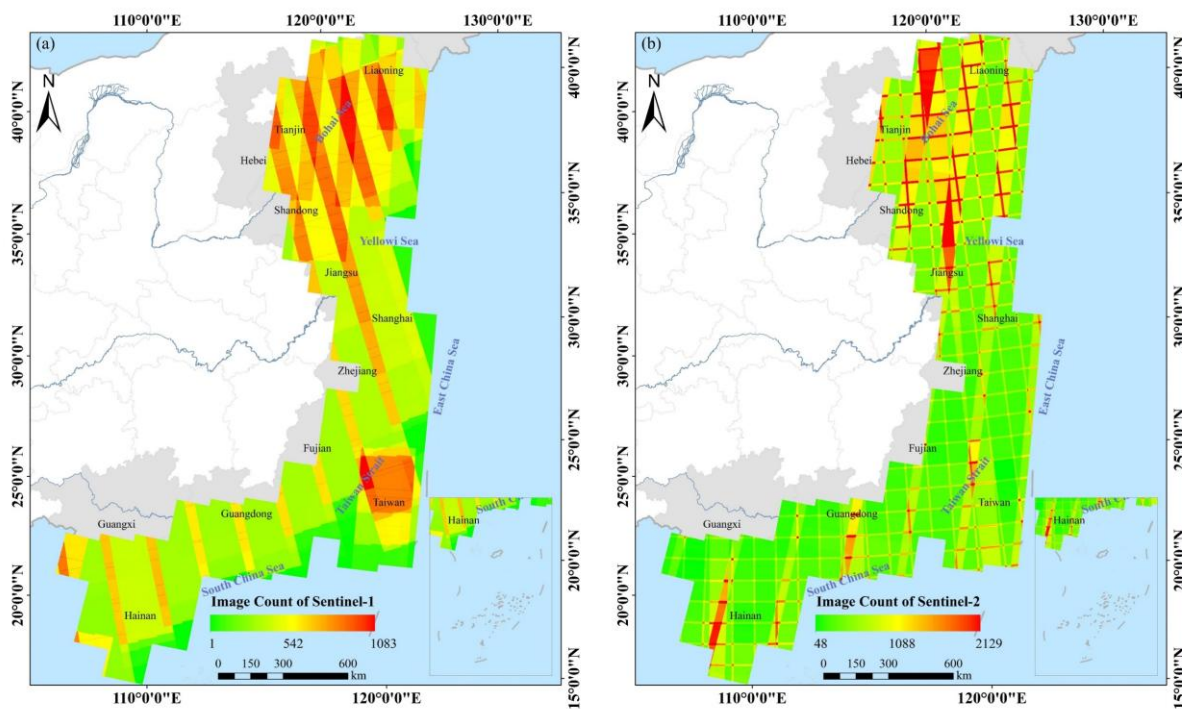

**Figure 2: Spatial distribution of Sentinel-1 and Sentinel-2 images used in this study: (a) Image Count of Sentinel-1, (b) Image Count of Sentinel-2.**

### 2.3 Other data

The NASADEM dataset, provided by NASA and based on C-band radar with a 30 m resolution, accurately reflects global elevation. This study used the 2000 NASADEM data, resampled to 10 m, as terrain data for the period from 2016 to 2023. VIIRS nighttime light data, provided by NOAA and NASA with a 500 m resolution, were used to represent global nighttime illumination. The data from 2016 to 2023 were selected, resampled to 10 meters, clipped to [0, 63] to remove outliers, normalized, and then used as the nighttime light dataset for this study. The land cover data selected for this study is the Landsat-





120 derived annual China Land Cover Dataset (CLCD) from 1990 to 2023, with a resolution of 30 m, used to study changes in the  
area of human infrastructure squeeze risk (Yang et al., 2021). The per capita GDP, resident population, built-up area, and road  
area of the study area from 1990 to 2023 were obtained from the National Bureau of Statistics and local statistical bureaus  
(<https://www.stats.gov.cn/>). In addition, data from 1990, 2000, 2010, and 2020 were extracted for Jinjiang, Licheng, and  
Fengze Districts of Quanzhou City to assess human infrastructure squeeze risk. GDP and population density data were obtained  
125 from the China GDP and Population Spatial Distribution Kilometer Grid Datasets (Xu et al., 2017). Built-up area data were  
sourced from the GHS-BUILT-H R2023A dataset published by the European Commission Joint Research Centre in 2022–  
2023 (Pesaresi et al., 2023). Road network data were derived from the national basic geographic information data  
(<https://www.webmap.cn/>) and Harvard University (Baum-Snow et al., 2017). If data for a specific year were unavailable, the  
data from the nearest available year were used instead.

130 **2.4 Reference datasets**

In this study, we used three datasets to evaluate our identified sandy beach dataset (Table 1): (1) The 2023 China sandy beach  
dataset identified through visual interpretation of Sentinel-2 and Google Earth imagery; (2) The 2022 China 10m sandy beach  
dataset identified by Ni et al. (Ni et al., 2024) using a support vector machine method based on Sentinel-2 imagery; (3) The  
2020 China coastal land use dataset at 10m resolution, identified by Miao et al. (Li et al., 2022) using an object-oriented  
135 classification method based on Sentinel-2 imagery.

**Table 1: Datasets used to evaluate the accuracy of sandy beach classification.**

| Datasets  | Time | Spatial resolution | Dataset source                                                                        | References         |
|-----------|------|--------------------|---------------------------------------------------------------------------------------|--------------------|
| Dataset 1 | 2023 | \                  | derived from our visual interpretation                                                | \                  |
| Dataset 2 | 2022 | 10m                | <a href="https://zenodo.org/records/14051471">https://zenodo.org/records/14051471</a> | Ni et al. (2024)   |
| Dataset 3 | 2020 | 10m                | <a href="http://fuselab.hku.hk">http://fuselab.hku.hk</a>                             | Miao et al. (2022) |

**3 Study area and materials**

To accurately monitor the current status of sandy beaches in China, this study integrates multi-source data from 2016 to 2023,  
including Sentinel-1/2 imagery, terrain data, and nighttime light data. By processing these multi-source datasets, spectral,  
140 terrain, texture, and polarization features were extracted to construct a multi-source, multi-feature, and multi-model framework  
based on a stacking ensemble learning approach, aiming to delineate the spatial distribution of sandy beaches in China. On  
this basis, by combining existing impervious surface data from 1990 to 2023, 100 m buffer zones were established for overlay  
analysis to identify areas at risk of human infrastructure squeeze and to analyze their spatiotemporal dynamics. The technical  
framework of the study is illustrated (Fig. 3).

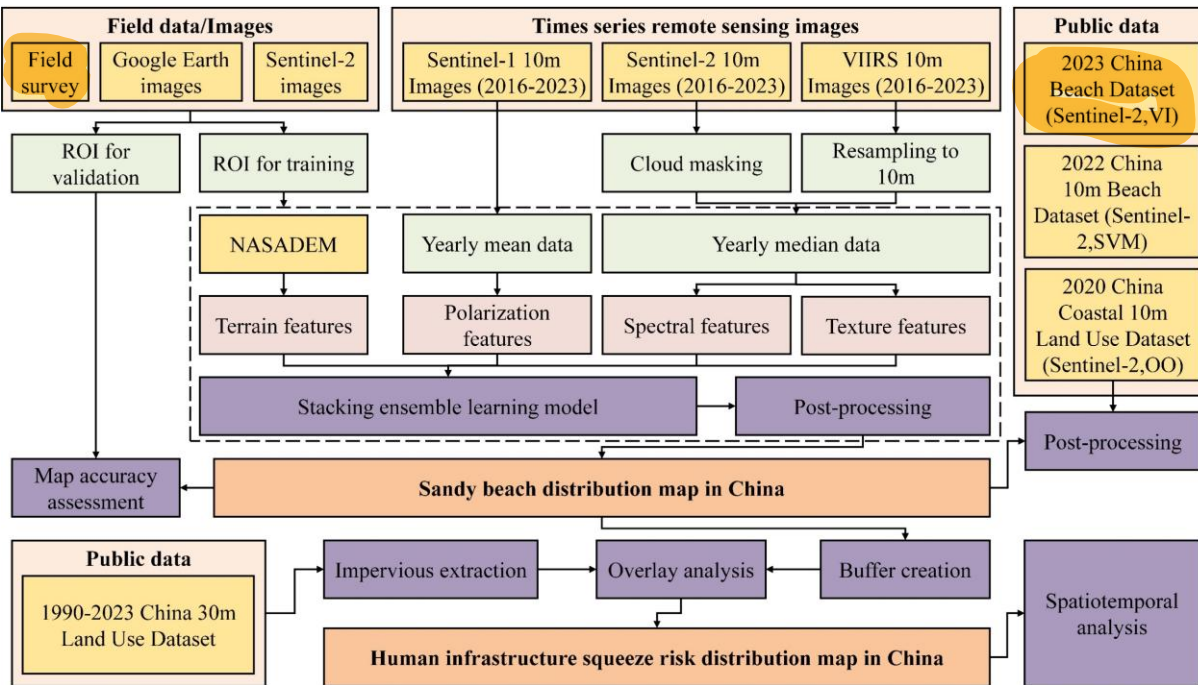

**Figure 3: Spatial distribution of Sentinel-1 and Sentinel-2 images used in this study: (a) Image Count of Sentinel-1, (b) Image Count of Sentinel-2.**

### 3.1 Sample generation via visual interpretation

The main land cover types in the non-beach areas of the study area include farmland, forest, water, and impervious, which are defined based on typical coastal land cover characteristics in China (Yang et al., 2021). In the sample library, these non-beach types, in addition to the beach samples, play an important role. Therefore, we define the land use types in the study area as farmland, forest, water, impervious, and sandy beaches. Based on **field surveys**, we conducted annual visual interpretation using Google Earth and Sentinel-2 imagery to label samples from 2016 to 2023. Through this approach, a candidate **sample library** was built, containing 47,937 samples, with 33,243 for model training and 14,694 for testing (Fig. 4).

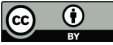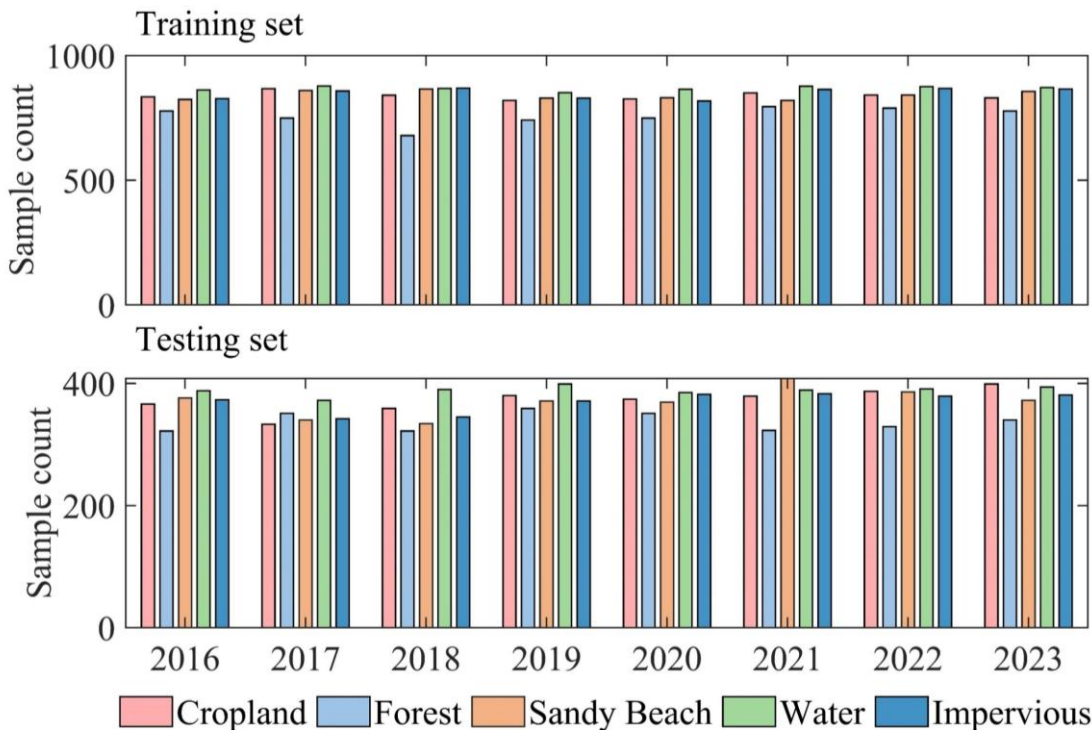

Figure 4: Training and testing sets.

### 3.2 Constructing sandy beach classification input features using multi-source data

This study selected 24 indicators from four dimensions—spectral, terrain, polarization, and texture—as input features for the ensemble learning model (Table 2). First, the VV and VH polarization modes were selected as polarization features. Next, five bands—Band 2, Band 3, Band 4, Band 8, and Band 11—along with eight spectral indices—NDWI, NDVI, NDSI, NDBI, EVI, SAVI, BSI, and NDUI—were chosen as spectral features. Then, grayscale images were generated using Band 3, Band 4, and Band 8, and six texture metrics—contrast, correlation, variance, angular second moment, inverse difference moment, and entropy—were derived from the grayscale images as texture features. Finally, elevation, slope, and aspect were selected as terrain features.

Table 2: Input features for sandy beach classification.

| Features     | Indices                                  | Definition                                                      | Reference             |
|--------------|------------------------------------------|-----------------------------------------------------------------|-----------------------|
| Polarization | Polarization bands                       | VV, VH                                                          | Jiang et al., 2023    |
| Spectral     | Spectral bands                           | Band2, Band3, Band4, Band8, Band11                              | Nemmaoui et al., 2015 |
|              | Normalized Difference Water Index (NDWI) | $(\text{Band3} - \text{Band8}) / (\text{Band3} + \text{Band8})$ | Zou et al., 2018      |





| Features | Indices                                       | Definition                                                                                                                            | Reference            |
|----------|-----------------------------------------------|---------------------------------------------------------------------------------------------------------------------------------------|----------------------|
|          | Normalized Difference Vegetation Index (NDVI) | $(\text{Band8} - \text{Band4}) / (\text{Band8} + \text{Band4})$                                                                       | Pickens et al., 2020 |
|          | Normalized Difference Snow Index (NDSI)       | $(\text{Band3} - \text{Band11}) / (\text{Band3} + \text{Band11})$                                                                     | Xiao et al., 2024    |
|          | Normalized Difference Built-up Index (NDBI)   | $(\text{Band11} - \text{Band8}) / (\text{Band11} + \text{Band8})$                                                                     | Zhang et al., 2023   |
|          | Enhanced Vegetation Index (EVI)               | $2.5 * (\text{Band8} - \text{Band4}) / (\text{Band8} + 6 * \text{Band4} - 7.5 * \text{Band2} + 1)$                                    | Jiang et al, 2023    |
|          | Soil Adjusted Vegetation Index (SAVI)         | $1.5 * (\text{Band8} - \text{Band4}) / (\text{Band8} + \text{Band4} + 0.5)$                                                           | Rhyma et al., 2020   |
|          | Bare Soil Index (BSI)                         | $((\text{Band4} + \text{Band11}) - (\text{Band8} + \text{Band2})) / ((\text{Band4} + \text{Band11}) + (\text{Band8} + \text{Band2}))$ | Roy et al, 1996      |
|          | Normalized Difference Urban Index (NDUI)      | $(\text{VNTL} - \text{NDVI}) / (\text{VNTL} + \text{NDVI})$                                                                           | Zhang et al., 2015   |
|          | Texture                                       |                                                                                                                                       |                      |
|          | Grayscale images(Gray)                        | $0.3 * \text{Band8} + 0.59 * \text{Band4} + 0.11 * \text{Band3}$                                                                      |                      |
|          | Contrast (Con)                                | $\sum_{i,j} (i - j)^2 \cdot P(i, j)$                                                                                                  |                      |
|          | Correlation (Cor)                             | $\sum_{i,j} \frac{(i \cdot j \cdot P(i, j) \cdot \mu_x \cdot \mu_y)}{\sigma_x \cdot \sigma_y}$                                        |                      |
|          | Variance (Var)                                | $\sum_{i,j} (i - \mu)^2 \cdot P(i, j)$                                                                                                | Tassi et al, 2020    |
|          | Angular Second Moment (ASM)                   | $\sum_{i,j} P(i, j)^2$                                                                                                                |                      |
|          | Inverse Difference Moment (IDM)               | $\sum_{i,j} \frac{P(i, j)}{1 + (i - j)^2}$                                                                                            |                      |
|          | Entropy (Ent)                                 | $-\sum_{i,j} P(i, j) \cdot \log(P(i, j))$                                                                                             |                      |
| Terrain  | Terrain factors                               | Elevation, Slope, Aspect                                                                                                              | Lin et al, 2021      |

### 3.3 Sandy beach classification using an ensemble learning model

Stacking is a powerful ensemble learning method that uses predictions from multiple base learners as inputs to a meta-learner for final prediction. It combines the strengths of different models to overcome individual limitations, enhancing accuracy,



170 stability, and generalization (Chen et al., 2024). In this study, Random Forest (RF), Support Vector Machine (SVM),  
Classification and Regression Tree (CART), and Gradient Boosting Decision Tree (GBDT) were selected as **base learners**.  
Their output classification probabilities were used as input features for the meta-learner, which adopted the Minimum Distance  
(MD) method to integrate probabilities, calculate distances to target classes, and produce final results (Table 3).

**Table 3: Parameters of base models**

| Classifier | Definition                                                      |
|------------|-----------------------------------------------------------------|
| RF         | NumberOfTrees=100, minLeafCount=1, bagFraction=0.5              |
| SVM        | KernelType='RBF', cost=1, degree=3                              |
| CART       | MinLeafCount=1                                                  |
| GBDT       | NumberOfTrees=100, maxDepth=5, minLeafCount=1, learningRate=0.1 |
| MD         | \                                                               |

### 3.4 Model results processing and analysis

175 **3.4.1 Post-processing**

Pixel-based classification algorithms inevitably produce salt-and-pepper noise, and some small patches—such as buildings  
and bare land—are difficult to distinguish from **environmentally influenced** sandy beaches (Mattson et al., 2024). To reduce  
noise and remove isolated areas, we applied spatial filtering and connectivity analysis. A 100 m coastal buffer based on  
administrative boundaries was used to clip and filter non-sandy beach areas. We filled sandy beach patches smaller than  
180 2000 m<sup>2</sup> (20 pixels) and removed those smaller than 1000 m<sup>2</sup> (10 pixels). Finally, the sandy beach boundaries were refined  
through a thorough review and manual interpretation based on visual assessment.

#### 3.4.2 Accuracy assessment

This study assessed the accuracy of sandy beach classification results using 14,694 test samples from 2016 to 2023, calculating  
Producer's Accuracy (PA), User's Accuracy (UA), Kappa coefficient, Overall Classification Accuracy (OA), and sandy beach  
185 F1-score through the confusion matrix (Table 4).

**Table 4: Accuracy assessment metrics**

| Assessment indicators | Definition                          | Reference          |
|-----------------------|-------------------------------------|--------------------|
| PA                    | $PA_i = \frac{TP_i}{TP_i + FN_i}$   | Cao et al., 2021   |
| UA                    | $UA_i = \frac{TP_i}{TP_i + FP_i}$   | Zhang et al., 2022 |
| Kappa Coefficient     | $Kappa = \frac{P_0 - P_e}{1 - P_e}$ | Zhang et al., 2020 |



| Assessment indicators | Definition                                                             | Reference         |
|-----------------------|------------------------------------------------------------------------|-------------------|
| OA                    | $OA = \frac{\sum TP_i}{\sum TP_i + \sum FP_i + \sum FN_i + \sum TN_i}$ | Wang et al., 2023 |
| F1-score              | $F1_i \text{-score} = \frac{2 \cdot TP_i}{2 \cdot TP_i + FP_i + FN_i}$ | Fu et al., 2021   |

### 3.4.3 Analysis of human infrastructure squeeze risk trends

Approximately 33% of global sandy beaches lack more than 100 meters of infrastructure-free space, and in this study, human infrastructure squeeze risk is defined as the risk that occurs when infrastructure (such as buildings, roads, ports, etc.) is located within 100 meters of a sandy beach area. This threshold was chosen because infrastructure within this range can significantly impact the sandy beach area, leading to changes in its size or degradation of the ecosystem (Lansu et al., 2024). Therefore, this study established a 100 m buffer zone around the sandy beach area in China and conducted an overlay analysis using the impervious surface data from the Chinese land use dataset. The analysis generated annual human infrastructure squeeze risk areas to evaluate the squeeze effects of infrastructure on sandy beaches from 1990 to 2023. To further quantify the spatiotemporal changes in human infrastructure squeeze risk areas across regions, the study applied the Sen's slope method to calculate trend values (Zhang et al., 2023; Qiao et al., 2025). By applying this method, the study quantified the annual change rate and long-term trend of the risk areas across regions from 1990 to 2023.

## 4 Results and analysis

### 4.1 Accuracy Assessment and Mapping of Chinese Sandy Beaches

The performance of the ensemble learning algorithm was validated by calculating PA, UA, F1-score, OA, and Kappa coefficient, and we obtained the validation results (Table 5). From 2016 to 2023, all classification results had values above 0.9 for these metrics, with the best results in 2017, confirming the algorithm's stability, reliability, and accuracy in sandy beach classification.

**Table 5: Accuracy assessment of ensemble learning results**

| Year | PA   | UA   | F1-score | OA   | Kappa Coefficient |
|------|------|------|----------|------|-------------------|
| 2016 | 0.96 | 0.95 | 0.95     | 0.95 | 0.93              |
| 2017 | 0.99 | 0.96 | 0.97     | 0.96 | 0.95              |
| 2018 | 0.98 | 0.96 | 0.97     | 0.96 | 0.94              |
| 2019 | 0.96 | 0.95 | 0.95     | 0.95 | 0.94              |
| 2020 | 0.93 | 0.95 | 0.94     | 0.94 | 0.92              |
| 2021 | 0.97 | 0.93 | 0.95     | 0.95 | 0.93              |
| 2022 | 0.96 | 0.95 | 0.96     | 0.95 | 0.94              |



| Year    | PA   | UA   | F1-score | OA   | Kappa Coefficient |
|---------|------|------|----------|------|-------------------|
| 2023    | 0.96 | 0.95 | 0.96     | 0.95 | 0.94              |
| Average | 0.96 | 0.95 | 0.96     | 0.95 | 0.94              |

205 Based on the merged data of sandy beach recognition results over 8 years, the spatial distribution of the number, length, width, and area of sandy beaches in China is shown in Fig. 5. Nationwide, a total of 2,984 sandy beaches were identified, with a total length of 9,577.74 km, an average width of 45.13 m, and a total area of approximately 260.70 km<sup>2</sup>(Fig. 5).

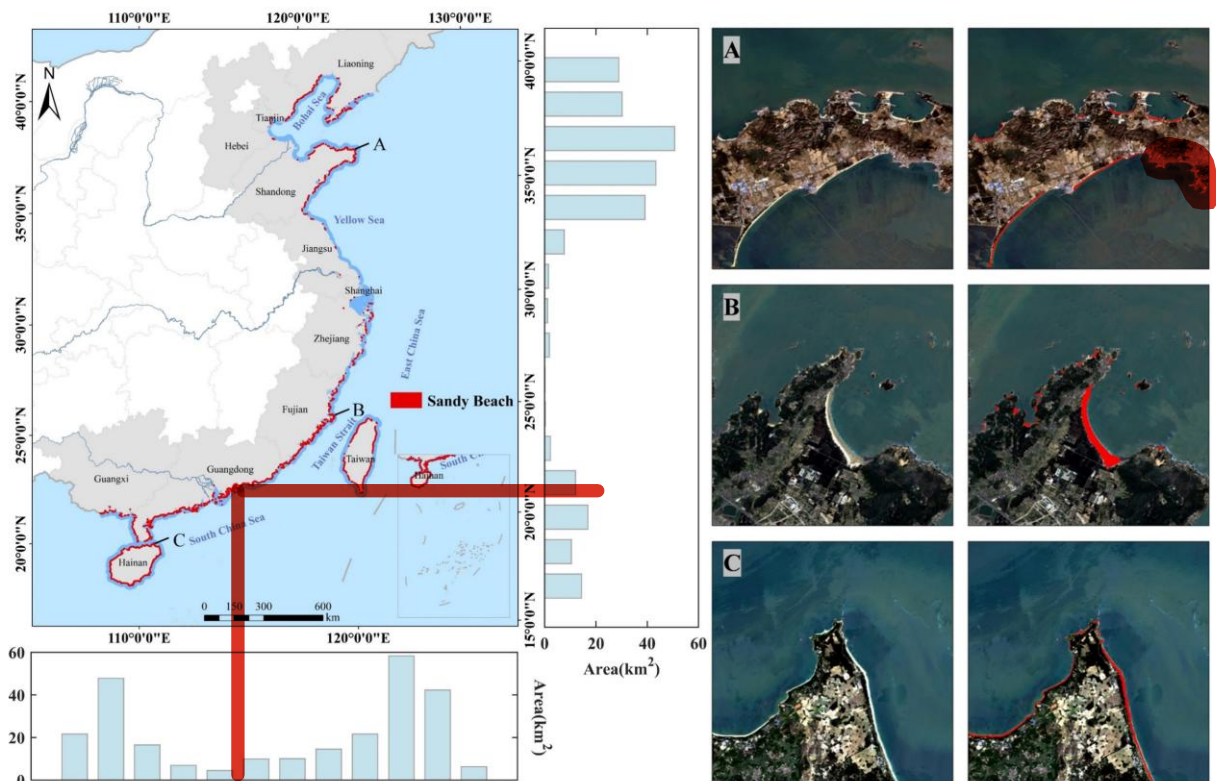

**Figure 5:** Distribution of sandy beaches in China and the morphology of typical coastal areas.

210 The maps/aerial images shown are Sentinel-2 imagery obtained from the public Google Earth Engine platform. © Google Earth Engine.

From a provincial perspective, Guangdong has the most sandy beaches, with 1,080 sandy beaches, and also ranks first in both total length (2,794.54 km) and total area (67.83 km<sup>2</sup>). In terms of sandy beach width, Shanghai has the widest sandy beaches, with an average width of 63.60 m. Other regions, such as Fujian (sandy beach area 41.12 km<sup>2</sup>, total length 1,174.34 km, width 49.5 m) and Shandong (sandy beach area 30.61 km<sup>2</sup>, total length 1,000.66 km, width 48.32 m), also show significant sandy beach resources. This highlights the notable spatial differences in coastal sandy beach resources across China. The results indicate that coastal sandy beach resources in China exhibit significant uneven distribution, with considerable differences in the number, shape, and scale of sandy beaches across different regions (Fig 6).

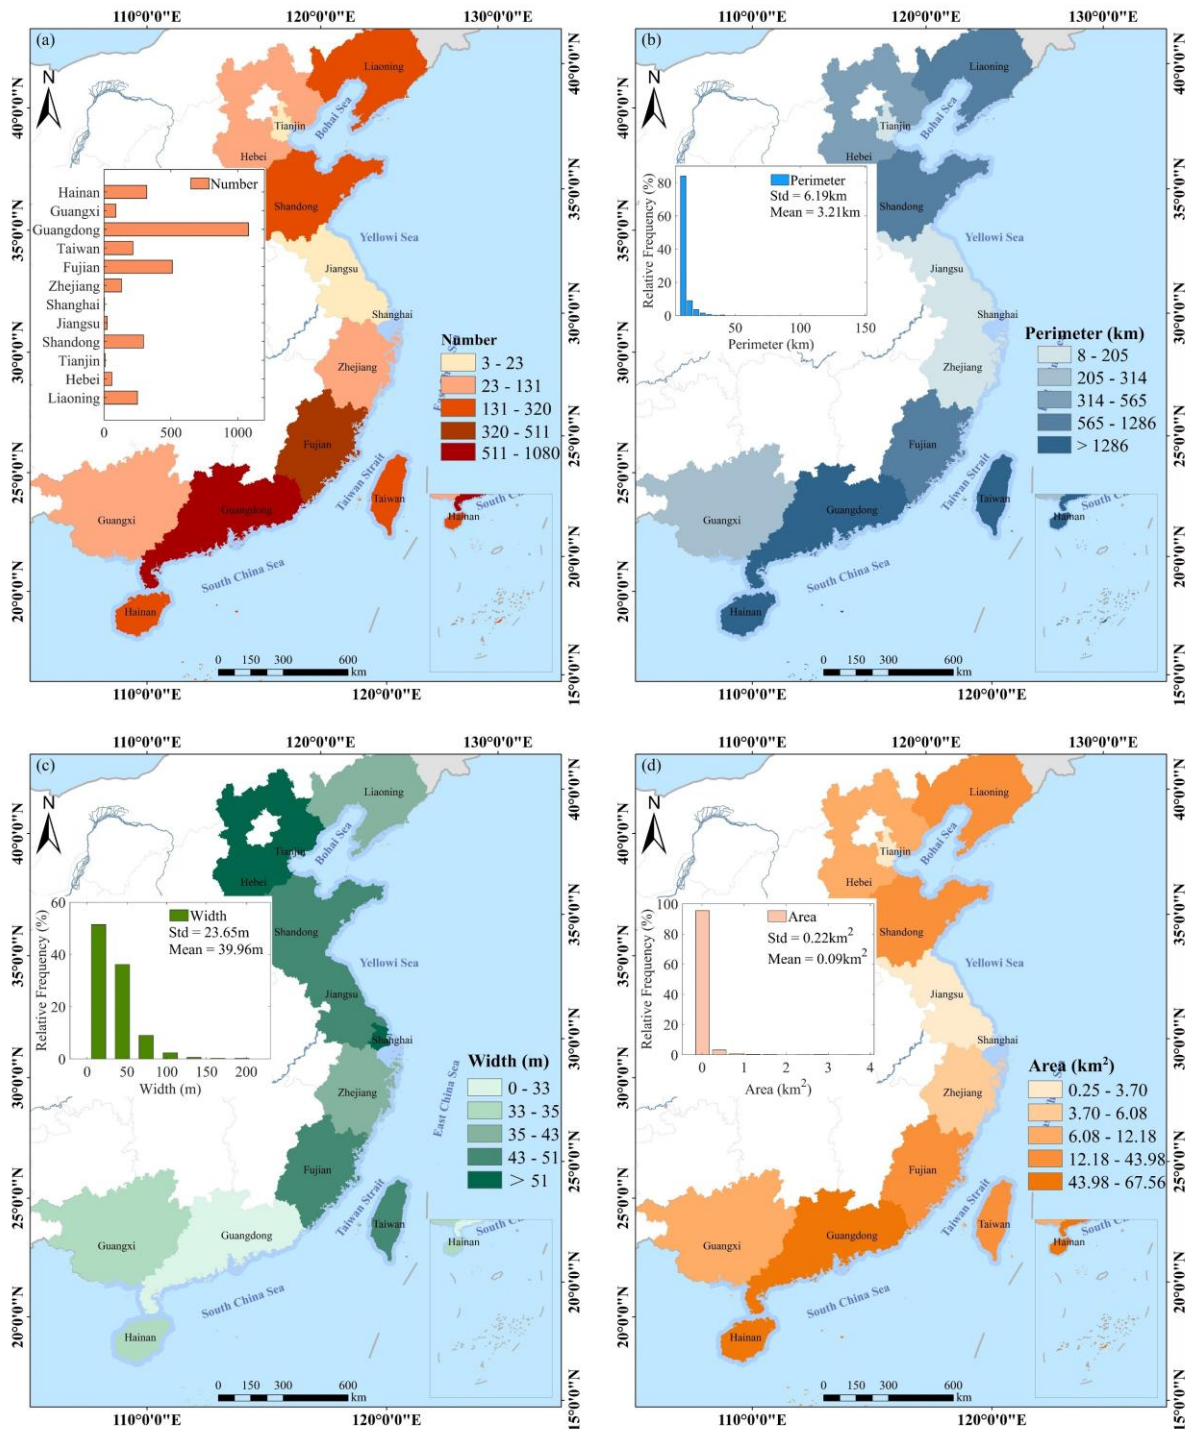

220 **Figure 6: Spatial distribution of sandy beaches in China: (a) Spatial distribution of sandy beach numbers, (b) Spatial distribution of sandy beach length, (c) Spatial distribution of sandy beach width, (d) Spatial distribution of sandy beach area.**





## 4.2 Comparison between other datasets

We evaluated the accuracy of each dataset using PA, UA, F1-score, and OA based on the validation set (Table X). To further assess the accuracy and reliability of the dataset, this study compared three reference datasets in selected areas of Fujian, Shandong, and Guangdong (Fig. 7). Dataset 1, generated through visual interpretation of Sentinel-2 imagery, is highly subjective and tends to misclassify non-beach areas as sandy beaches, while also missing some actual sandy beach areas. Dataset 2, constructed using a support vector machine on Sentinel-2 imagery, has high consistency with our dataset, but still misses some sandy beach areas. Dataset 3, created using an object-oriented approach, demonstrates high accuracy for other land cover types but faces significant misclassification issues with bare land and urban areas. The results show that our dataset provides higher accuracy in sandy beach classification, significantly reducing misclassification.

Table 6: The accuracy of each dataset.

| Dataset     | PA   | UA   | F1-score | OA   |
|-------------|------|------|----------|------|
| Our Dataset | 0.96 | 0.95 | 0.96     | 0.95 |
| Dataset 1   | 0.88 | 0.91 | 0.90     | 0.89 |
| Dataset 2   | 0.93 | 0.94 | 0.93     | 0.93 |
| Dataset 3   | 0.85 | 0.90 | 0.88     | 0.87 |

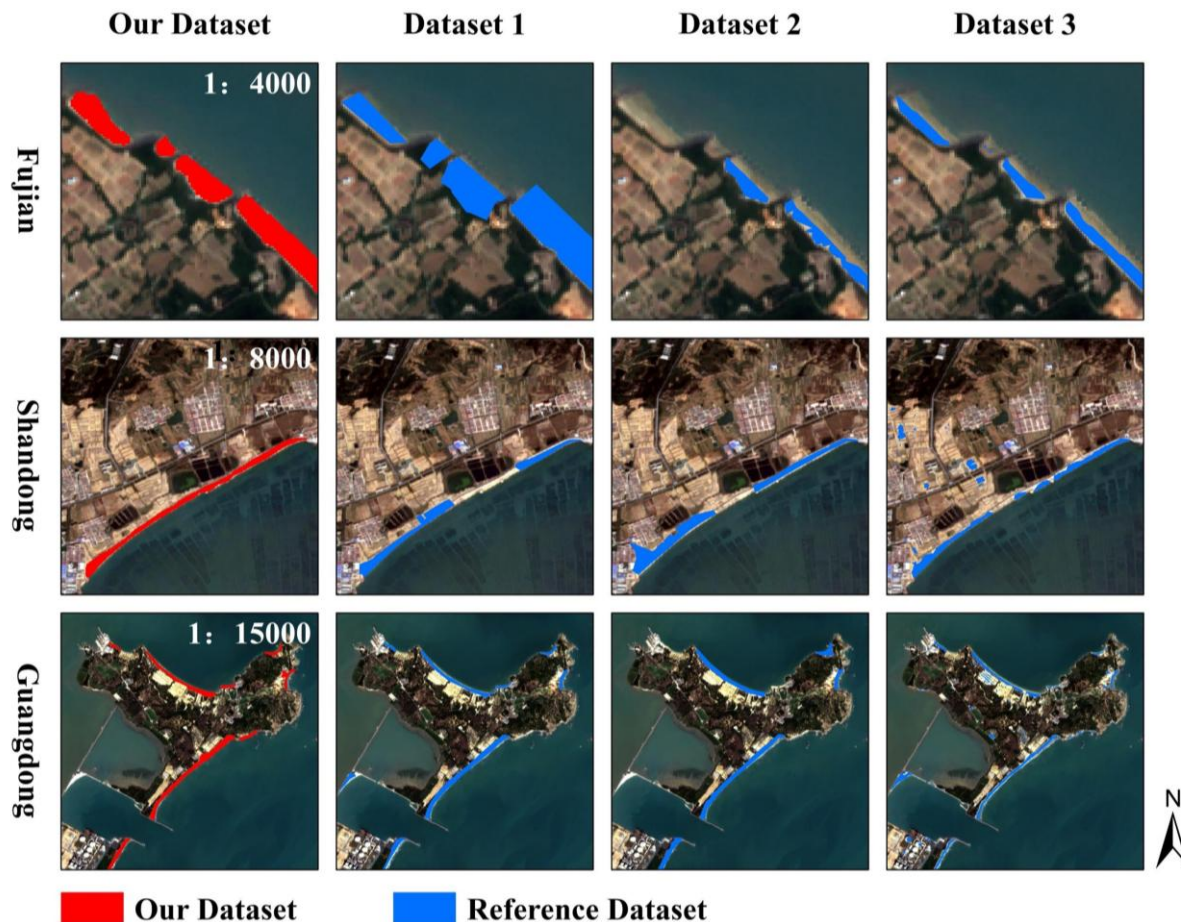

Figure 7: Comparative analysis of sandy beaches identified in this study and three reference datasets.

The maps/aerial images shown are Sentinel-2 imagery obtained from the public Google Earth Engine platform. © Google Earth Engine.

According to the comparison results, our dataset shows significant advantages over reference datasets 1, 2, and 3 in several key metrics, particularly in terms of sandy beach area, perimeter, width, and number. Overall, our dataset demonstrates a clear advantage in sandy beach area coverage, with larger areas in all regions: Fujian (41.12 km<sup>2</sup>), Guangdong (67.83 km<sup>2</sup>), and Taiwan (40.73 km<sup>2</sup>), significantly surpassing reference datasets 1 (2.35, 8.49, and 24.14 km<sup>2</sup>), 2 (8.49, 24.14, and 29.17 km<sup>2</sup>), and 3 (24.14, 28.22, and 49.35 km<sup>2</sup>). Regarding perimeter, our dataset closely matches actual sandy beach boundaries: Fujian (1,174.34 km), Guangdong (2,794.54 km), and Taiwan (1,287.03 km), compared to reference datasets 1 (573.10 km), 2 (334.23 km), and 3 (2,319.39 km). The excessive perimeter in reference dataset 3 is mainly due to misclassified areas. In terms of width, our dataset also outperforms reference datasets 1 (35.81 m), 2 (42.88 m), and 3 (55.22 m), with values of 49.50 m in Fujian, 32.83 m in Guangdong, and 50.70 m in Taiwan. The number of identified sandy beaches in our dataset is higher in all regions, further highlighting the reduced misclassification and noise in our results (Fig. 8).

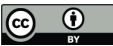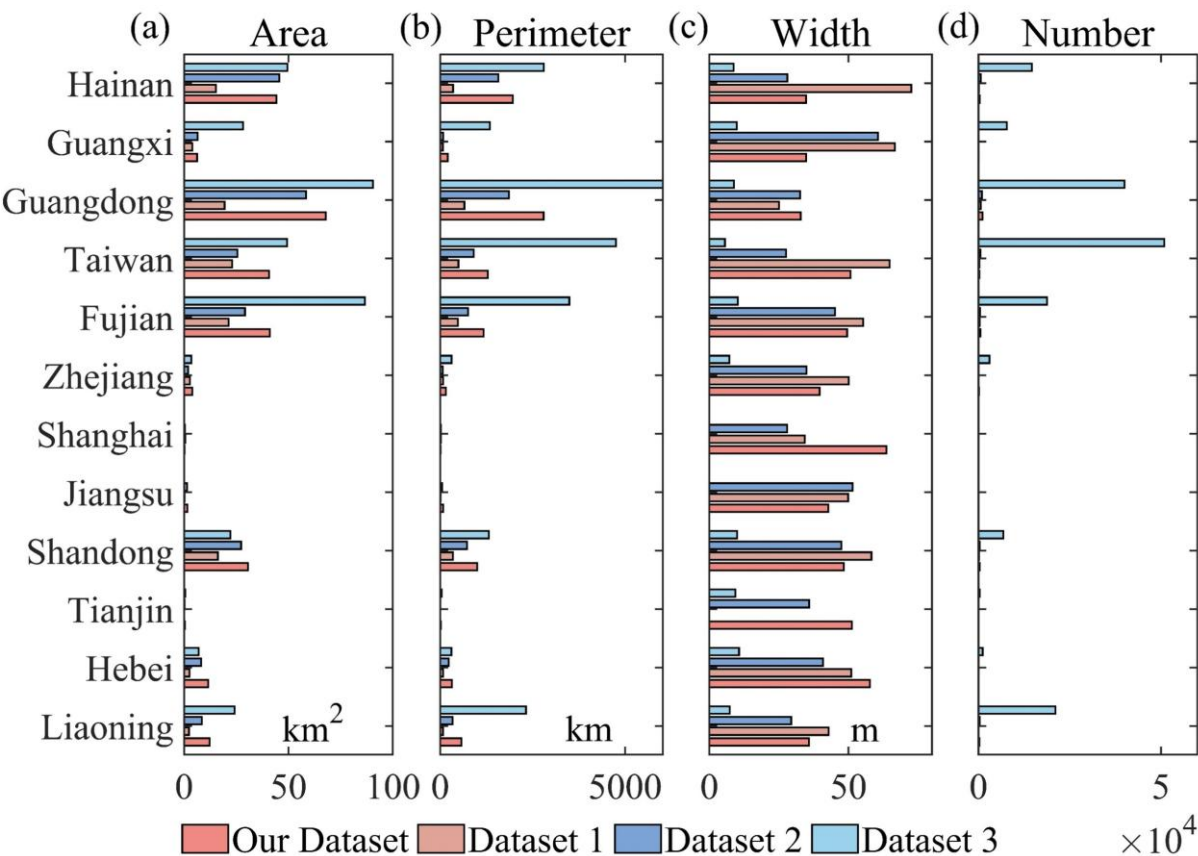

Figure 8: Provincial statistical comparison of sandy beaches in this study and three reference datasets (regions sorted from south to north): (a) Length comparison, (b) Width comparison, (c) Area comparison, (d) **Number comparison**.

### 4.3 Spatial-temporal changes in human infrastructure squeeze risk

250 We calculated and analyzed the temporal changes in the risk area of human infrastructure squeeze in the study area (Fig. 9). From 1990 to 2023, the risk area increased annually due to human infrastructure development (e.g., ports, dams, and coastal development). The area rose from 109.95 km² in 1990 to 245.58 km² in 2023, a total increase of about 135.63 km². The most significant increases occurred between 1990-2000. However, the growth rate has slowed in recent years, with only a 3.02 km² increase from 2020 to 2023, indicating stabilization due to enhanced regulation or resource saturation.

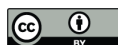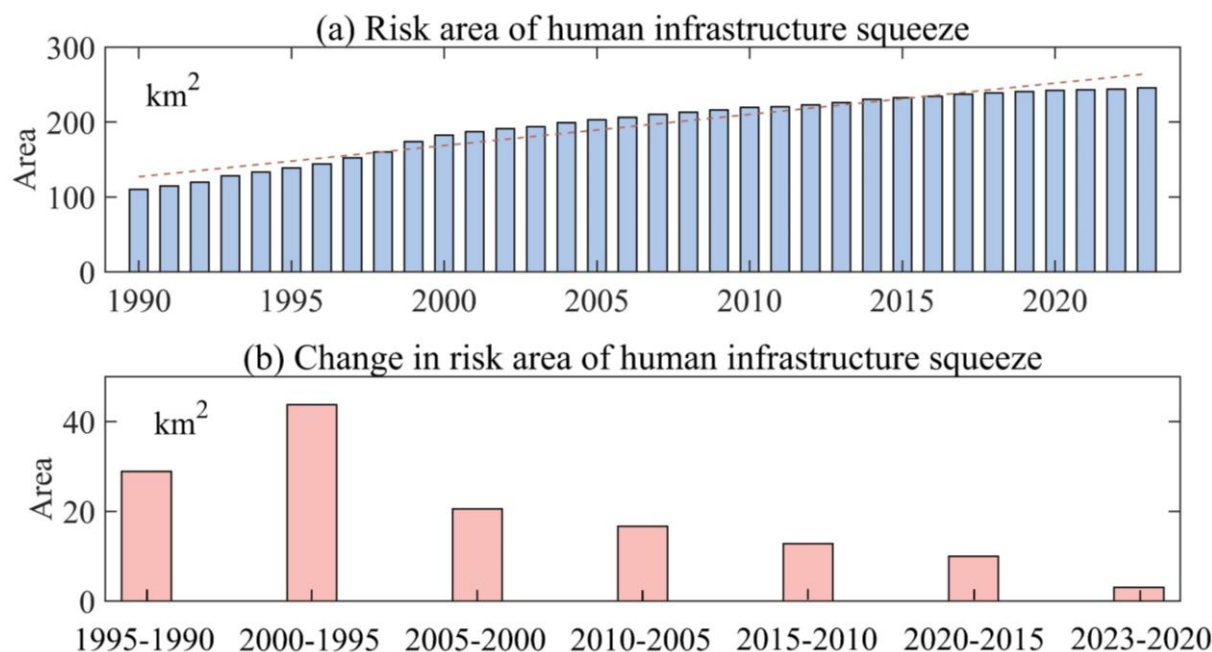

**Figure 9:** Interannual changes in human infrastructure squeeze on sandy beaches: **(a)** Risk area of human infrastructure squeeze from 1990 to 2023, **(b)** Changes in risk area of human infrastructure squeeze from 1990 to 2023.

We conducted a systematic assessment and comparative analysis of the current human infrastructure squeeze risk area in coastal regions of China in 2023, as well as its trend from 1990 to 2023 (Fig. 10). In 2023, the distribution of human infrastructure squeeze risk areas showed significant regional differences. The top three regions with the largest risk areas were Shandong (52.97 km<sup>2</sup>), Guangdong (47.48 km<sup>2</sup>), and Taiwan (45.81 km<sup>2</sup>), all exceeding 45 km<sup>2</sup>, accounting for a significant proportion of the national coastal squeeze risk area. These regions are densely populated, economically developed, and have high coastal development intensity, making them typical areas of coastal urbanization and industrial concentration. Fujian (33.42 km<sup>2</sup>) and Liaoning (24.33 km<sup>2</sup>) also showed high-risk areas, reflecting ongoing interference with natural sandy beaches due to port development and coastal infrastructure. In contrast, Shanghai (0.23 km<sup>2</sup>), Tianjin (0.66 km<sup>2</sup>), and Jiangsu (2.61 km<sup>2</sup>) had smaller risk areas, likely due to limited sandy beach resources. The trend analysis from 1990 to 2023 revealed significant growth rates in Guangdong (1.05 km<sup>2</sup>/year) and Fujian (0.73 km<sup>2</sup>/year), indicating rapid and substantial sandy beach squeeze risks.

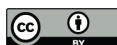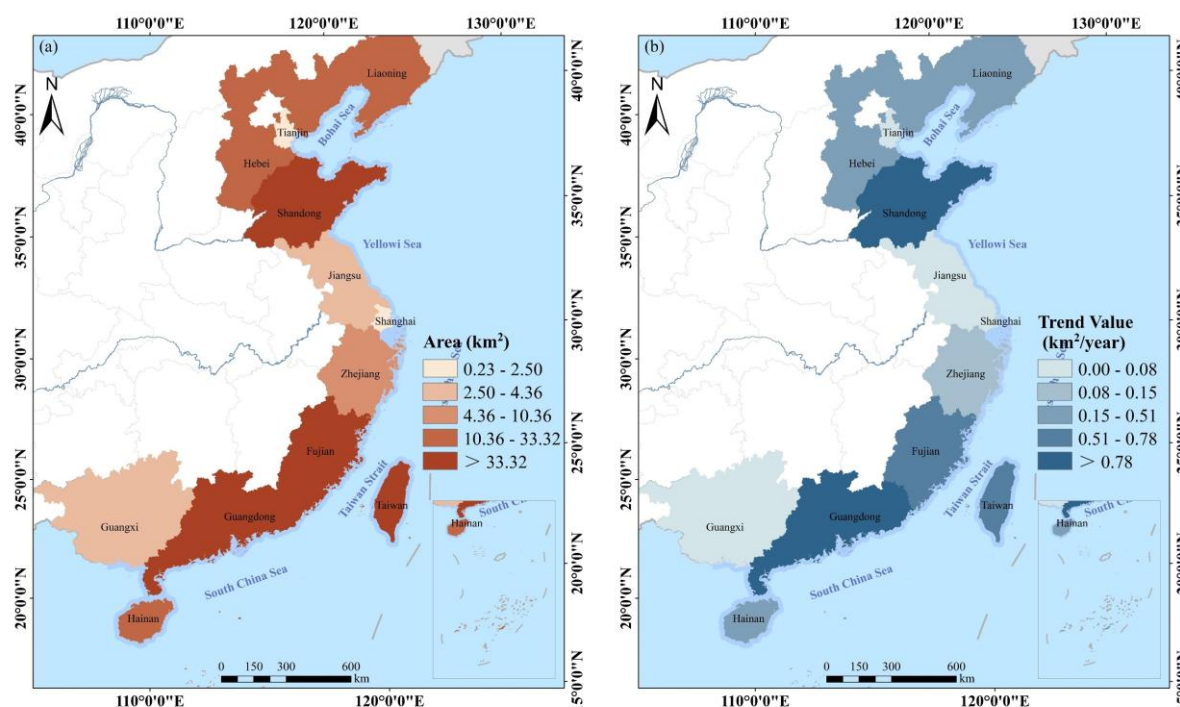

270 **Figure 10: Spatial changes of human infrastructure squeeze risk area: (a) Current risk area of human infrastructure squeeze, (b)**  
**Spatial changes of human infrastructure squeeze risk area from 1990 to 2023.**

## 5 Discussion

### 5.1 Selection and combination of input features

The influence of different input features and their combinations on recognition accuracy was analyzed (Table. 7). Results show  
 275 that spectral information outperforms other single features, achieving the highest accuracy. Polarization and terrain features  
 provide complementary information but yield moderate results. Texture features alone perform poorly. Multi-feature fusion  
 significantly boosts performance, with the combination of "Spectral + Texture + Terrain" reaching high accuracy, and the four-  
 feature combination achieving the best results. We compared the values of sandy beach and non-sandy beach areas for  
 polarization features (VV), texture features (Correlation), and terrain features (Elevation) to explore the factors contributing  
 280 to improved model accuracy (Fig. 11). In terms of polarization features (VV), the polarization reflectance of sandy beach areas  
 is lower, while non-sandy beach areas, such as water bodies and buildings, show higher reflectance (Novelli et al., 2016). This  
 may be due to the different scattering characteristics of sand compared to other surfaces, such as water, which is smooth and  
 reflects stronger signals (Lu et al., 2018). This contrast might be influenced by factors like data source and acquisition angle  
 and requires further investigation. For texture features (Correlation), sandy beach areas exhibit consistent textures due to  
 285 **uniform sand grain arrangements**, while non-sandy beach areas show more complex textures influenced by diverse land cover





(Hasituya et al., 2016). In regions with complex land cover, texture differences may diminish, affecting recognition accuracy. Regarding terrain features (Elevation), sandy beaches are typically flat and near sea level, while non-sandy beaches exhibit more significant elevation differences (Li et al., 2023). In regions with minimal terrain variation, terrain features may have a weaker influence (Wang et al., 2024).

290 **Table 7: Variations in input features and their combinations.**

| Input features                              | OA     | UA     | PA     | F1-score |
|---------------------------------------------|--------|--------|--------|----------|
| Spectral                                    | 0.8935 | 0.8806 | 0.9141 | 0.8970   |
| Texture                                     | 0.6433 | 0.6621 | 0.6070 | 0.6334   |
| Polarization                                | 0.7598 | 0.7391 | 0.8141 | 0.7748   |
| Terrain                                     | 0.8270 | 0.7910 | 0.8958 | 0.8402   |
| Spectral + Texture                          | 0.8935 | 0.8827 | 0.9113 | 0.8967   |
| Spectral + Polarization                     | 0.8992 | 0.9001 | 0.9014 | 0.9008   |
| Spectral + Terrain                          | 0.9107 | 0.9001 | 0.9268 | 0.9133   |
| Texture + Polarization                      | 0.8284 | 0.8246 | 0.8408 | 0.8326   |
| Texture + Terrain                           | 0.8435 | 0.8218 | 0.8831 | 0.8513   |
| Polarization + Terrain                      | 0.8477 | 0.8182 | 0.9000 | 0.8571   |
| Spectral + Texture + Polarization           | 0.9114 | 0.9104 | 0.9155 | 0.9129   |
| Spectral + Texture + Terrain                | 0.9271 | 0.9130 | 0.9465 | 0.9295   |
| Spectral + Polarization + Terrain           | 0.9178 | 0.9161 | 0.9225 | 0.9193   |
| Texture + Polarization + Terrain            | 0.8828 | 0.8750 | 0.8972 | 0.8860   |
| Spectral + Texture + Polarization + Terrain | 0.9321 | 0.9253 | 0.9423 | 0.9337   |

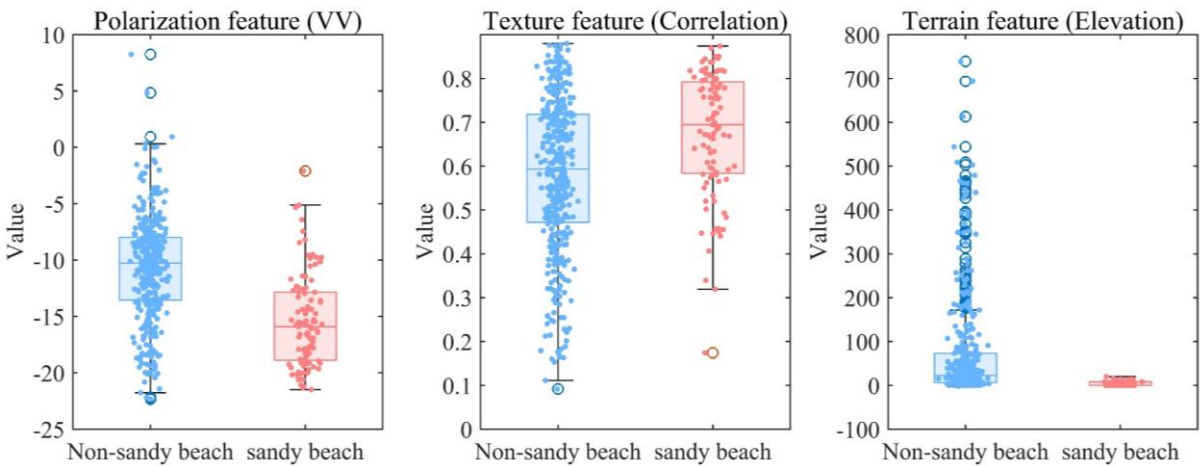

**Figure 11:** Comparison of polarization, texture, and terrain features between sandy beaches and non-sandy beaches.



## 5.2 Effectiveness and robustness of ensemble learning

In this study, the Stacking model integrates four base classifiers—RF, SVM, CART, and GBDT—effectively combining their strengths in feature extraction and classification. This ensemble approach enhances the model’s adaptability and generalization, improving its robustness in complex sandy beach area recognition tasks (Chen et al., 2021; Chrysafis et al., 2017). Each base model has its advantages: RF handles high-dimensional features well and reduces overfitting, SVM performs well near class boundaries, CART is simple and efficient, while GBDT captures nonlinear relationships and feature interactions effectively (Tian et al., 2025; Mugunthan et al., 2025). By integrating these models, Stacking adapts better to challenges such as varying lighting, tidal conditions, and complex terrain, thus reducing misclassification. Although GBDT and RF slightly outperform in the F1-score median (0.9333 and 0.9309 respectively), the Stacking model achieves comparable results (F1-score: 0.9307, OA: 0.9292) with smaller variance across experiments (Fig. 12). This demonstrates its stable performance under different data distributions. Overall, Stacking not only ensures competitive accuracy but also offers **strong applicability** for remote sensing tasks like sandy beaches change monitoring.

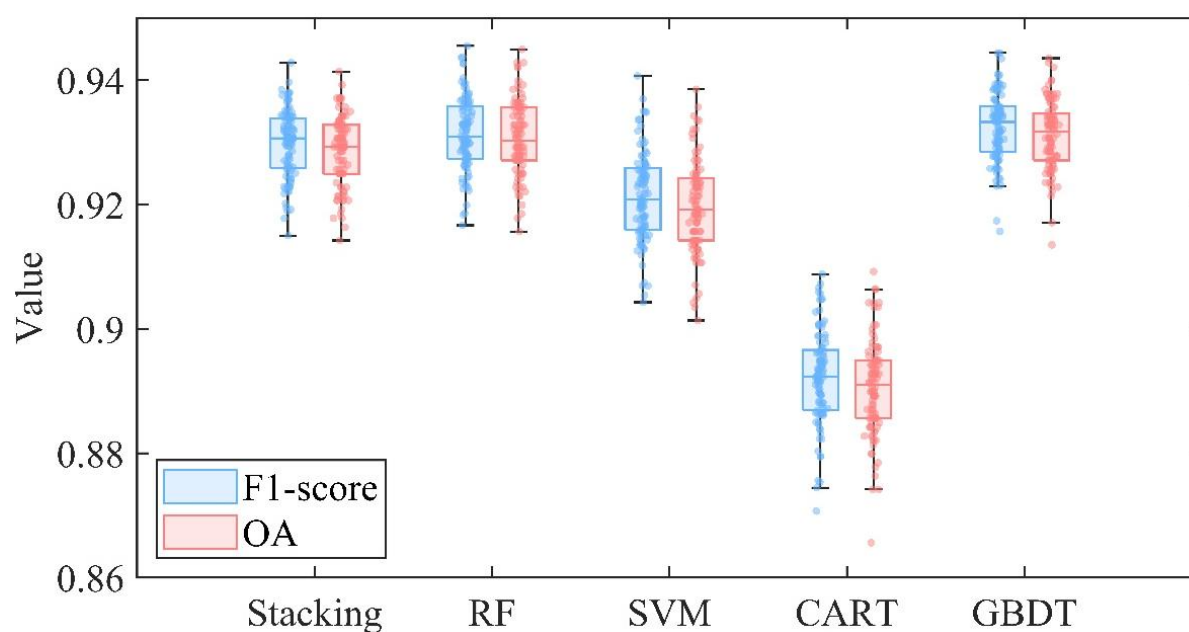

Figure 12: Comparison of F1-score and overall accuracy across models.

## 5.3 Factors shaping the spatial pattern of China's sandy beaches

This study produced a 10 m resolution sandy beach dataset for China's coastal regions. The spatial distribution of sandy beaches shows a clear pattern: more in the north and the south, and fewer in the central coast. This pattern is shaped by a combination of geological structures, marine dynamics, climate conditions, and river sediment input (Tian et al., 2025; Ma et al., 2024; Wang et al., 2010). The northern coast features flat terrain and large rivers like the Yellow River and Liao River, which deliver abundant sediment, supporting sandy beach formation (Zhang et al., 2022). In the south, strong marine forces and tropical



climates allow rivers to carry large amounts of sediment to the coast, where wide sandy beaches form under suitable conditions (Zhou et al., 2023; Mentaschi et al., 2018). In contrast, the central coast is dominated by bedrock and muddy coastlines. Major rivers such as the Yangtze mainly contribute to tidal flats and muddy shores rather than typical sandy beaches (Kuai et al., 2021; Liu et al., 2020). Overall, the distribution of sandy beaches in China reflects the combined effects of sediment supply, coastal type, and hydrodynamic conditions, **resulting in more sandy beaches in the north and south, and fewer on the central coast.**

#### **5.4 Exploration of the factors affecting the change in human infrastructure squeeze risk area**

Based on the 1990-2023 Sen's slope trend analysis, several patterns emerge when analyzing the relationship between human infrastructure squeeze risk areas and related factors across regions (Fig. 13). Economically developed regions like Shanghai, Jiangsu, and Tianjin show slower growth in squeeze risk areas. This can be attributed to their smaller sandy beach areas, which limit the available space for human activities, and their higher per capita GDP, which is associated with more efficient urban planning and infrastructure development, leading to slower increases in squeeze risk. In contrast, regions with larger sandy beach areas, such as Guangdong, Shandong, Fujian, Taiwan, and Hainan, show faster growth in squeeze risk, as more space for development leads to higher risk over time. Additionally, regions with larger resident population, like Guangdong, Shandong, and Hebei, experience a positive correlation between population growth and squeeze risk. As the resident population increases, urbanization accelerates, putting more pressure on infrastructure and increasing the squeeze risk. Both built-up area and road area are positively correlated with squeeze risk, as their expansion reflects urban growth, intensifying competition for space.

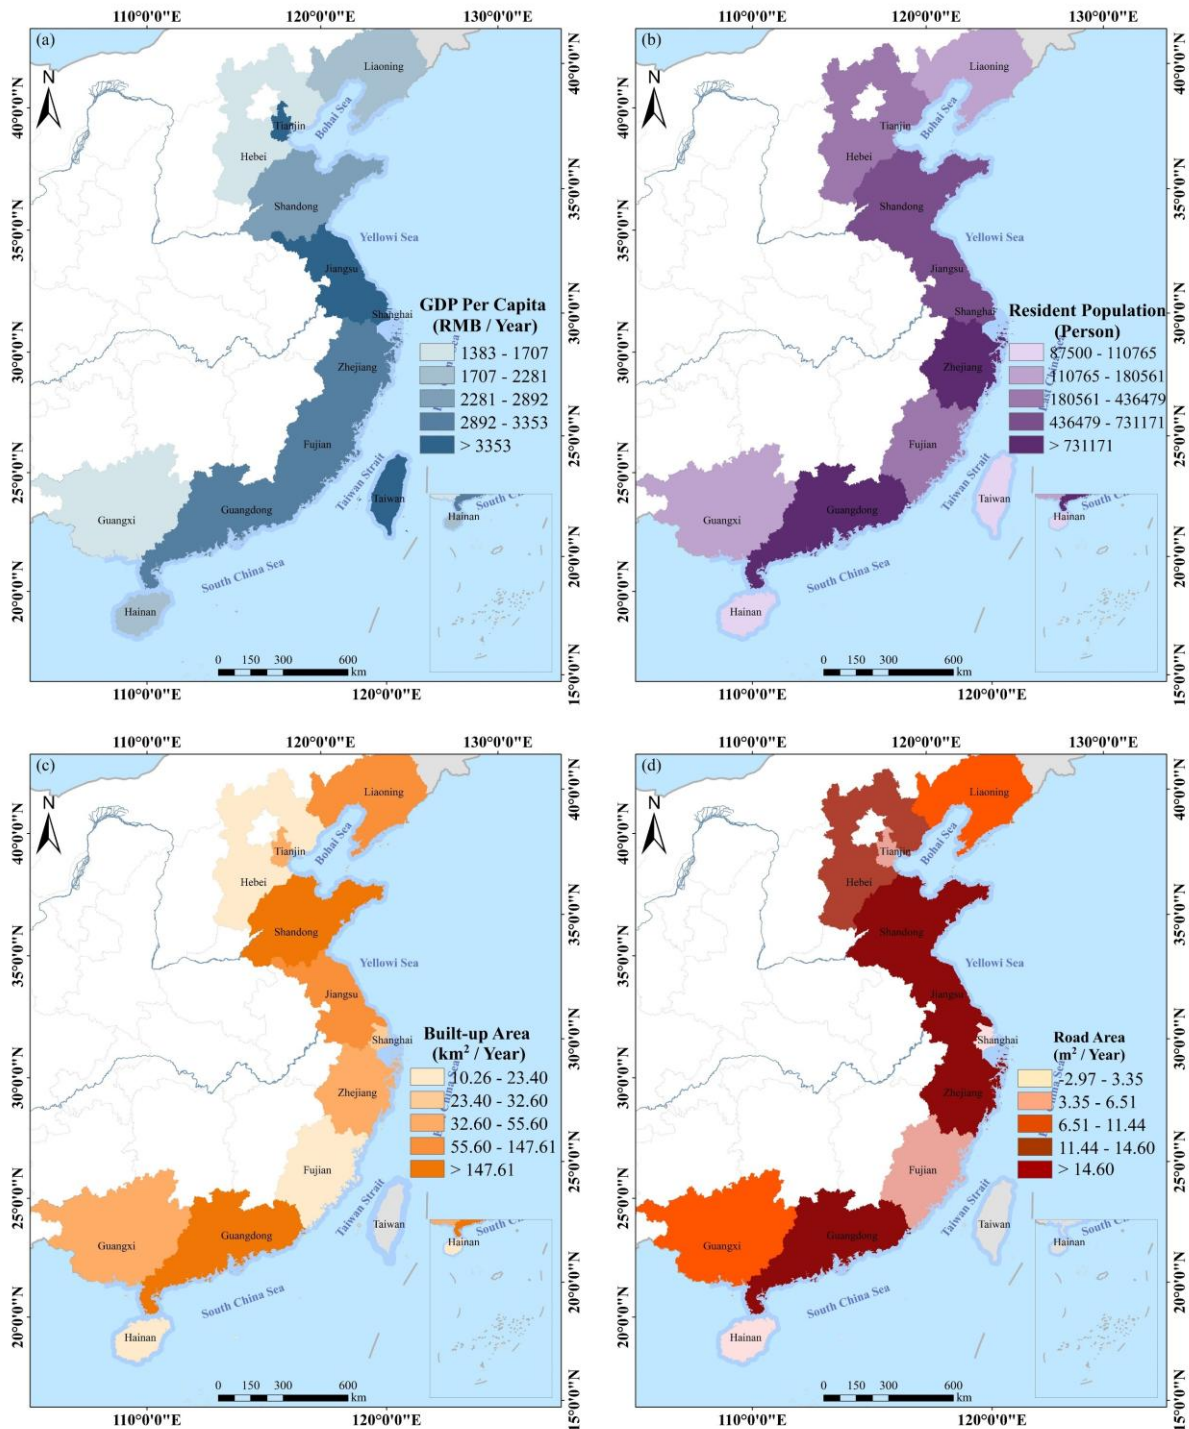

**Figure 13: Spatial changes of various factors from 1990 to 2023: (a) Spatial change of per capita GDP, (b) Spatial change of resident population, (c) Spatial change of built-up area, (d) Spatial change of road area.**

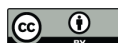

We conducted a comprehensive analysis of the 1990, 2000, 2010, and 2020 data for the typical areas of human infrastructure squeeze risk in Jinjiang District, Quanzhou District, and Fengze District of Quanzhou, as detailed in the appendix. The analysis focused on the changes in indicators such as GDP, population density, built-up area, and road length. The results show that all these indicators have significantly increased over the past few decades, which is closely related to the risk of human infrastructure squeeze on sandy beaches. Specifically, with the growth of GDP, the expansion of economic activities has led to a continuous concentration of population in these areas, increasing the potential pressure on sandy beaches and the surrounding ecosystem. The expansion of built-up areas reflects the progress of urbanization, which, especially in vulnerable ecological regions such as sandy beaches, is often accompanied by a squeeze on natural resources. Although the increase in road length has promoted economic development, it has also intensified the risk of the squeeze on coastlines and surrounding sandy beaches.

## 5.5 Limitations of the proposed method and dataset

This study combines stacking ensemble learning models with remote sensing imagery to create a 10m resolution sandy beach dataset, integrating multi-dimensional features such as spectral, terrain, polarization, and texture features. However, the study has some areas for improvement: (1) The sandy beach area is significantly affected by tidal changes, and the remote sensing images acquired at different tidal levels may exhibit considerable spatial differences. The current study has not fully addressed the issue of tidal phase matching. Future research should combine tidal prediction models or measured tidal data to select multi-temporal remote sensing images that are consistent with the target tidal phase, reducing the impact of tidal variations on beach extraction and improving the spatiotemporal accuracy of beach extraction. (2) This study has preliminarily applied the Stacking ensemble learning method; however, there is still room for optimization in model selection, fusion strategy, and feature contribution evaluation. Future research can further optimize the base model structure, explore the synergistic effects between different models, and incorporate feature importance analysis to enhance the stability and classification accuracy of the ensemble model. (3) Currently, the assessment of human infrastructure squeeze risk in this study primarily relies on impervious surface expansion and buffer zone analysis. However, with relatively low spatial and temporal resolution, it is difficult to accurately depict the dynamic process of human infrastructure squeeze on sandy beaches. Future research should introduce higher spatial and temporal resolution data (e.g., high-frequency remote sensing monitoring, annual building change data, etc.) to enable continuous dynamic monitoring and analysis of the human infrastructure squeeze process.

## 6 Data availability

The dataset on the distribution of sandy beaches in China and the distribution of human infrastructure squeeze risk is available at: <https://doi.org/10.5281/zenodo.15307240> (Meng et al., 2025).





## 7 Conclusions

This study used ensemble learning algorithms to identify sandy beach areas between 2016 and 2023 and validated the superiority of the method through various classification metrics. The results demonstrate that the method exhibits high stability and accuracy in the beach classification task, effectively distinguishing sandy beaches from other land types. Additionally, there are significant regional differences, with some regions having abundant sandy beach resources while others have relatively fewer sandy beach areas, indicating an uneven distribution of resources. By comparing with several reference datasets, the proposed dataset in this study showed higher accuracy and reliability, especially in some typical coastal areas, ensuring precise classification of sandy beach regions. This provides more accurate data support for sandy beach resource management and ecological protection, particularly in the context of increasingly scarce beach resources.

In addition to identifying sandy beach resources, this study also focused on the risk of infrastructure squeeze on sandy beach resources along China's coast. The study found that as infrastructure projects such as port construction and seawall building continue to advance, coastal areas are facing the gradual squeeze of their sandy beaches. Although the rate of expansion in some regions has slowed, the pressure from infrastructure development on beach resources continues to persist. The impact of infrastructure squeeze varies between regions, with some regions facing more severe challenges, while others experience relatively minor changes in sandy beach resources. These findings provide important theoretical support for future sandy beach resource management and protection, highlighting the balance between infrastructure development and ecological preservation. This is particularly important in the context of rapid urbanization and economic development. Achieving sustainable sandy beach resource protection will be a crucial focus for future coastal region policy planning.

## References

- Bao, Z., Sha, J., Li, X., Hanchiso, T., and Shifaw, E.: Monitoring of beach litter by automatic interpretation of unmanned aerial vehicle images using the segmentation threshold method, *Mar. Pollut. Bull.*, 137, 388–398, doi:10.1016/j.marpolbul.2018.08.009, 2018.
- Barbier, E. B., Hacker, S. D., Kennedy, C., Koch, E. W., Stier, A. C., and Silliman, B. R.: The value of estuarine and coastal ecosystem services, *Ecol. Monogr.*, 81(2), 169–193, doi:10.1890/10-1510.1, 2011.
- Baum-Snow, N., Brandt, L., Henderson, J. V., Turner, M. A., and Zhang, Q.: Roads, Railroads, and Decentralization of Chinese Cities, *Rev. Econ. Stat.*, 99(3), 435–448, doi:10.1162/REST\_a\_00643, 2017.
- Brščić, K., and Šugar, T.: Users' perceptions and satisfaction as indicators for sustainable beach management, *Tour. Hosp. Manag.*, 26(1), 33–48, doi:10.1016/j.ocecoaman.2009.02.001, 2020.
- Cao, B., Yu, L., Naipal, V., Ciais, P., Li, W., Zhao, Y., Wei, W., Chen, D., Liu, Z., and Gong, P.: A 30 m terrace mapping in China using Landsat 8 imagery and digital elevation model based on the Google Earth Engine, *Earth Syst. Sci. Data*, 13(5), 2437–2456, doi:10.5194/essd-13-2437-2021, 2021.



- Chen, B., Tu, Y., Song, Y., Theobald, D. M., Zhang, T., Ren, Z., Li, X., Yang, J., Wang, J., Wang, X., Gong, P., Bai, Y., and  
 395 Xu, B.: Mapping essential urban land use categories with open big data: Results for five metropolitan areas in the United States  
 of America, *ISPRS J. Photogramm. Remote Sens.*, 178, 203–218, doi:10.1016/j.isprsjprs.2021.06.010, 2021.
- Chen, C., Liang, J., Xie, F., Hu, Z., Sun, W., Yang, G., Yu, J., Chen, L., Wang, L., Wang L., Chen, H., He, X., and Zhang, Z.:  
 Temporal and spatial variation of coastline using remote sensing images for Zhoushan archipelago, China, *Int. J. Appl. Earth  
 Obs. Geoinf.*, 107, doi:10.1016/j.jag.2022.102711, 2022.
- 400 Chen, Y., Xu, C., Ge, Y., Zhang, X., and Zhou, Y.: A 100 m gridded population dataset of China's seventh census using  
 ensemble learning and big geospatial data, *Earth Syst. Sci. Data*, 16(8), 3705–3718, doi:10.5194/essd-16-3705-2024, 2024.
- Chrysafis, I., Mallinis, G., Gitas, I., and Tsakiri-Strati, M.: Estimating Mediterranean forest parameters using multi seasonal  
 Landsat 8 OLI imagery and an ensemble learning method, *Remote Sens. Environ.*, 199, 154–166,  
 doi:10.1016/j.rse.2017.07.018, 2017.
- 405 Duan, Y., Tian, B., Li, X., Liu, D., Sengupta, D., Wang, Y., and Peng, Y.: Tracking changes in aquaculture ponds on the China  
 coast using 30 years of Landsat images, *Int. J. Appl. Earth Obs. Geoinf.*, 102, doi:10.1016/j.jag.2021.102383, 2021.
- Feng, J., Kong, L., Li, H., Cannon, N., Chang, X., and Ma, L.: Evaluation of the sustainable development capacity of bay cities  
 in China in the context of Blue Bay Remediation Action, *Sustainability*, 17(7), doi:10.3390/su17074567, 2025.
- Hasituya, Chen, Z., Wang, L., Wu, W., Jiang, Z., and Li, H.: Monitoring plastic-mulched farmland by Landsat-8 OLI imagery  
 410 using spectral and textural features, *Remote Sens.*, 8(4), doi:10.3390/rs8040297, 2016.
- Jia, M., Wang, Z., Mao, D., Ren, C., Wang, C., and Wang, Y.: Rapid, robust, and automated mapping of tidal flats in China  
 using time series Sentinel-2 images and Google Earth Engine, *Remote Sens. Environ.*, 255, 112320,  
 doi:10.1016/j.rse.2021.112320, 2021.
- Jiang, W., Tian, B., Duan, Y., Chen, C., and Hu, Y.: Rapid mapping and spatial analysis on the distribution of photovoltaic  
 415 power stations with Sentinel-1&2 images in Chinese coastal provinces, *Int. J. Appl. Earth Obs. Geoinf.*, 118, 103206,  
 doi:10.1016/j.jag.2023.103206, 2023.
- Kuai, Y., Tao, J., Zhou, Z., Aarninkhof, S., and Wang, Z. B.: Sediment characteristics and intertidal beach slopes along the  
 Jiangsu coast, China, *J. Mar. Sci. Eng.*, 9(3), 273, doi:10.3390/jmse9030273, 2021.
- Lansu, E. M., Reijers, V. C., Hofer, S., Luijendijk, A., Rietkerk, M., Wassen, M. J., Lammerts, E. J., and van der Heide.: A  
 420 global analysis of how human infrastructure squeezes sandy coasts, *Nat. Commun.*, 15(1), 432, doi:10.1038/s41467-023-  
 44120-5, 2024.
- Latella, M., Luijendijk, A., Moreno-Rodenas, A. M., and Camporeale, C.: Satellite image processing for the coarse-scale  
 investigation of sandy coastal areas, *Remote Sens.*, 13(22), 4552, doi:10.3390/rs13224552, 2021.
- Li, J., Wang, H., Wang, J., Zhang, J., Lan, Y., and Deng, Y.: Combining multi-source data and feature optimization for plastic-  
 425 covered greenhouse extraction and mapping using the Google Earth Engine: A case in Central Yunnan Province, China,  
*Remote Sens.*, 15(13), 3356, doi:10.3390/rs15133356, 2023.



- Li, Y., and Niu, Z.: Systematic method for mapping fine-resolution water cover types in China based on time series Sentinel-1 and 2 images, *Int. J. Appl. Earth Obs. Geoinf.*, 106, 102670, doi:10.1016/j.jag.2021.102670, 2022.
- Lin, J., Jin, X., Ren, J., Liu, J., Liang, X., and Zhou, Y.: Rapid mapping of large-scale greenhouse based on integrated learning  
430 algorithm and Google Earth Engine, *Remote Sens.*, 13(7), 1337, doi:10.3390/rs13071337, 2021.
- Liu, G., Cai, F., Qi, H., Liu, J., Lei, G., Zhu, J., Cao, H., Zheng, J., Zhao, S., and Yu, F.: A summary of beach nourishment in China: The past decade of practices, *Shore Beach*, 88(1), 65–73, doi:10.34237/1008836, 2020.
- Lu, L., Tao, Y., and Di, L.: Object-based plastic-mulched landcover extraction using integrated Sentinel-1 and Sentinel-2 data, *Remote Sens.*, 10(11), 1723, doi:10.3390/rs10111723, 2018.
- 435 Lu, Y., Yuan, J., Lu, X., Su, C., Zhang, Y., Wang, C., Cao, X., Li, Q., Su, J., Ittekkot, V., Garbutt, R. A., Bush, S., Fletcher, S., Wagey, T., Kachur, A., and Sweijid, N.: Major threats of pollution and climate change to global coastal ecosystems and enhanced management for sustainability, *Environ. Pollut.*, 239, 670–680, doi:10.1016/j.envpol.2018.04.135, 2018.
- Ma, F., Lü, P., Cao, M., Yu, J., and Xia, Z.: Morphological and sedimentary characteristics of raked linear dunes in the southeastern Taklimakan Desert, China, *Aeolian Res.*, 67–69, doi:10.1016/j.aeolia.2024.100923, 2024.
- 440 Masria, A.: Bridging coastal challenges: The role of remote sensing and future research, *Reg. Stud. Mar. Sci.*, 73, doi:10.1016/j.rsma.2024.103502, 2024.
- Mattson, M., Sousa, D., Quandt, A., Ganster, P., and Biggs, T.: Mapping multi-decadal wetland loss: Comparative analysis of linear and nonlinear spatiotemporal characterization, *Remote Sens. Environ.*, 302, doi:10.1016/j.rse.2023.113969, 2024.
- Mejjad, N., Rossi, A., and Pavel, A. B.: The coastal tourism industry in the Mediterranean: A critical review of the socio-  
445 economic and environmental pressures & impacts, *Tour. Manag. Perspect.*, 44, doi:10.1016/j.tmp.2022.101007, 2022.
- Meng, J., Xu, D. Y., Tao, Z. X., and Ge, Q. S.: Spatial Patterns of Sandy Beaches in China and Risk Analysis of Human Infrastructure Squeeze Based on Multi-Source Data and Ensemble Learning, Zenodo [data set], doi:10.5281/zenodo.15307240, 2025.
- Mentaschi, L., Vousdoukas, M. I., Pekel, J. F., Voukouvalas, E., and Feyen, L.: Global long-term observations of coastal  
450 erosion and accretion, *Sci. Rep.*, 8, 12876, doi:10.1038/s41598-018-30904-w, 2018.
- Miao, L., Chen, B., Webster, C., Gong, P., and Xu, B.: The land-sea interface mapping: China's coastal land covers at 10 m for 2020, *Sci. Bull.*, 67(17), 1750–1754, 2022.
- Mugunthan, J. S., Duguay, C. R., and Zakharova, E.: Machine learning based classification of lake ice and open water from Sentinel-3 SAR altimetry waveforms, *Remote Sens. Environ.*, 299, doi:10.1016/j.rse.2023.113891, 2023.
- 455 Nativí-Merchán, S., Caiza-Quinga, R., Saltos-Andrade, I., Martillo-Bustamante, C., Andrade-García, G., Quiñonez, M., Cervantes, E., and Cedeño, J.: Coastal erosion assessment using remote sensing and computational numerical model. Case of study: Libertador Bolívar, Ecuador, *Ocean Coast. Manag.*, 214, doi:10.1016/j.ocecoaman.2021.105894, 2021.
- Nemmaoui, A., Aguilar, M. A., Aguilar, F. J., Novelli, A., and García Lorca, A.: Greenhouse crop identification from multi-temporal multi-sensor satellite imagery using object-based approach: A case study from Almería (Spain), *Remote Sens.*, 10(11),  
460 doi:10.3390/rs10111751, 2018.



- Ni, M., Xu, N., Ou, Y., Yao, J., Li, Z., Mo, F., Huang, C., Xin, H., and Xu, H.: The first 10-m China's national-scale sandy beach map in 2022 derived from Sentinel-2 imagery, *Int. J. Digit. Earth*, 17(1), doi:10.1080/17538947.2024.2425163, 2024.
- Novelli, A., Aguilar, M. A., Nemmaoui, A., Aguilar, F. J., and Tarantino, E.: Performance evaluation of object based greenhouse detection from Sentinel-2 MSI and Landsat 8 OLI data: A case study from Almería (Spain), *Int. J. Appl. Earth Obs. Geoinf.*, 52, 403–411, doi:10.1016/j.jag.2016.07.011, 2016.
- Pesaresi, M. and Politis, P.: GHS-BUILT-H R2023A – GHS Building Height, Derived from AW3D30, SRTM30, and Sentinel-2 Composite (2018), *Eur. Comm., Joint Res. Cent.*, 2023, doi:10.2905/85005901-3A49-48DD-9D19-6261354F56FE.
- Pickens, A. H., Hansen, M. C., Hancher, M., Stehman, S. V., Tyukavina, A., Potapov, P., Marroquin, B., and Sherani, Z.: Mapping and sampling to characterize global inland water dynamics from 1999 to 2018 with full Landsat time-series, *Remote Sens. Environ.*, 243, doi:10.1016/j.rse.2020.111792, 2020.
- Ponte Lira, C., Nobre Silva, A., Taborda, R., and Freire de Andrade, C.: Coastline evolution of Portuguese low-lying sandy coast in the last 50 years: an integrated approach, *Earth Syst. Sci. Data*, 8(1), 265–278, doi:10.5194/essd-8-265-2016, 2016.
- Qiao, L., and Xia, H.: The impact of drought time scales and characteristics on gross primary productivity in China from 2001 to 2020, *Geo-spat. Inf. Sci.*, 28, 284–302, doi:10.1080/10095020.2023.2223554, 2024.
- Rabehi, W., Amin Larabi, M. E., Benabbou, O., Kreri, S., and Dellani, H.: Sandy beach mapping using a deep learning approach: potential method for automated monitoring of Algerian coastal erosion, *J. Coast. Res.*, 39, 960–970, doi:10.2112/JCOASTRES-D-22-00050.1, 2023.
- Ranasinghe, R.: Assessing climate change impacts on open sandy coasts: a review, *Earth-Sci. Rev.*, 160, 320–332, doi:10.1016/j.earscirev.2016.07.011, 2016.
- Rhyman, P. P., Norizah, K., Hamdan, O., Faridah-Hanum, I., and Zulfa, A. W.: Integration of normalized difference vegetation index and soil-adjusted vegetation index for mangrove vegetation delineation, *Remote Sens. Appl. Soc. Environ.*, 17, 100276, doi:10.1016/j.rsase.2020.100276, 2020.
- Rodríguez-Padilla, I., Mariño-Tapia, I., and Ruiz de Alegría-Arzaburu, A.: Daily timescale analysis of sediment transport and terrain changes on a mesotidal sandy beach under low to moderate wave conditions, *Mar. Geol.*, 474, 107597, doi:10.1016/j.margeo.2024.107597, 2024.
- Roy, P. S., Sharma, K. P., and Jain, A.: Stratification of density in dry deciduous forest using satellite remote sensing digital data—an approach based on spectral indices, *J. Biosci.*, 21, 723–734, doi:10.1007/BF02703124, 1996.
- Salameh, E., Frappart, F., Almar, R., Baptista, P., Heygster, G., Lubac, B., Raucoles, D., Almeida, L. P., Bergsma, E. W. J., Capo, S., De Michele, M., Idier, D., Li, Z., Marieu, V., Poupardin, A., Silva, P. A., Turki, I., and Laignel, B.: Monitoring beach topography and nearshore bathymetry using spaceborne remote sensing: a review, *Remote Sens.*, 11, 2212, doi:10.3390/rs11192212, 2019.
- Sekar, C. S., Kankara, R. S., and Kalaivanan, P.: Pixel-based classification techniques for automated shoreline classification on open sandy coast using different optical satellite images, *Arab. J. Geosci.*, 15, 978, doi:10.1007/s12517-022-10014-1, 2022.



- Sekovski, I., Stecchi, F., Mancini, F., and Del Rio, L.: Image classification methods applied to shoreline classification on very  
 495 high-resolution multispectral imagery, *Int. J. Remote Sens.*, 35, 3556–3578, doi:10.1080/01431161.2014.903436, 2014.
- Splinter, K. D., Harley, M. D., and Turner, I. L.: Remote sensing is changing our view of the coast: insights from 40 years of  
 monitoring at Narrabeen-Collaroy, Australia, *Remote Sens.*, 10, 1744, doi:10.3390/rs10111744, 2018.
- Sun, S., Xue, Q., Xing, X., Zhao, H., and Zhang, F.: Remote sensing image interpretation for coastal zones: a review, *Remote  
 Sens.*, 16, 4016, doi:10.3390/rs16244016, 2024.
- 500 Tassi, A., and Vizzari, M.: Object-oriented LULC classification in Google Earth Engine combining SNIC, GLCM, and  
 machine learning algorithms, *Remote Sens.*, 12, 3771, doi:10.3390/rs12223771, 2020.
- Temmerman, S., Meire, P., Bouma, T. J., Herman, P. M., Ysebaert, T., and De Vriend, H. J.: Ecosystem-based coastal defence  
 in the face of global change, *Nature*, 504, 79–83, doi:10.1038/nature12859, 2013.
- Tian, B., Wu, W., Yang, Z., and Zhou, Y.: Drivers, trends, and potential impacts of long-term coastal reclamation in China  
 505 from 1985 to 2010, *Estuar. Coast. Shelf Sci.*, 170, 83–90, doi:10.1016/j.ecss.2016.01.006, 2016.
- Tian, P., Liu, Y., Li, J., Pu, R., Cao, L., Zhang, H., Ai, S., and Yang, Y.: Mapping coastal aquaculture ponds of China using  
 Sentinel SAR images in 2020 and Google Earth Engine, *Remote Sens.*, 14, 5473, doi:10.3390/rs14215473, 2022.
- Tian, S., Sha, A., Luo, Y., Ke, Y., Spencer, R., Hu, X., Ning, M., Zhao, Y., Deng, R., Gao, Y., Liu, Y., and Li, D.: A novel  
 framework for river organic carbon retrieval through satellite data and machine learning, *ISPRS J. Photogramm. Remote Sens.*,  
 510 221, 109–123, doi:10.1016/j.isprsjprs.2025.01.002, 2025.
- Tian, W., Dong, Y., Fu, S., Zhang, S., Huang, D., and Yang, L.: Surfzone–beach–dune interactions on the Chinese coasts, *Mar.  
 Geol.*, 481, 107637, doi:10.1016/j.margeo.2025.107637, 2025.
- Toure, S., Diop, O., Kpalma, K., and Maiga, A. S.: Shoreline detection using optical remote sensing: a review, *ISPRS Int. J.  
 Geo-Inf.*, 8, 77, doi:10.3390/ijgi8020077, 2019.
- 515 Turner, I. L., Harley, M. D., Short, A. D., Simmons, J. A., Bracs, M. A., Phillips, M. S., and Splinter, K. D.: A multi-decade  
 dataset of monthly beach profile surveys and inshore wave forcing at Narrabeen, Australia, *Sci. Data*, 3, 160024,  
 doi:10.1038/sdata.2016.24, 2016.
- Valderrama-Landeros, L., Flores-Verdugo, F., and Flores-de-Santiago, F.: Assessing the coastal vulnerability by combining  
 field surveys and the analytical potential of CoastSat in a highly impacted tourist destination, *Geographies*, 2, 642–656,  
 520 doi:10.3390/geographies2040036, 2022.
- Vicens-Miquel, M., Medrano, F. A., Tissot, P. E., Kamangir, H., Starek, M. J., and Colburn, K.: A deep learning based method  
 to delineate the wet/dry shoreline and compute its elevation using high-resolution UAS imagery, *Remote Sens.*, 14, 6149,  
 doi:10.3390/rs14236149, 2022.
- Wang, M., Mao, D., and Xiao, X.: Interannual changes of coastal aquaculture ponds in China at 10-m spatial resolution during  
 525 2016–2021, *Remote Sens. Environ.*, 284, 113333, doi:10.1016/j.rse.2023.113333, 2023.
- Wang, W., and Wu, Z.: Coastal dune rock development and Holocene climate changes in South China, *J. Geogr. Sci.*, 20, 469–  
 480, doi:10.1007/s11442-010-0469-8, 2010.





- Wang, X., Zhou, M., and Xia, Y.: Evolution of China's coastal economy since the Belt and Road Initiative based on nighttime light imagery, *Sustainability*, 16, 1001, doi:10.3390/su16031001, 2024.
- 530 Wang, Z., Fang, Z., and Chang, J.: A two-step approach to extracting sandy beaches through integrating spatial semantic information from open-source geospatial datasets, *Trans. GIS*, 28, 2379–2396, doi:10.1111/tgis.13238, 2024.
- Wei, X., Zheng, W., and Xi, C.: Shoreline classification in SAR image based on advanced geometric active contour model, *Remote Sens.*, 13, 641, doi:10.3390/rs13040641, 2021.
- Xiao, X., and Liang, S.: Assessment of snow cover mapping algorithms from Landsat surface reflectance data and application  
 535 to automated snowline delineation, *Remote Sens. Environ.*, 307, 113444, doi:10.1016/j.rse.2024.113444, 2024.
- Xu, N., Wang, L., and Xu, H.: Deriving accurate intertidal topography for sandy beaches using ICESat-2 data and Sentinel-2 imagery, *J. Remote Sens.*, 4, 100041, doi:10.34133/remotesensing.100041, 2024.
- Xu, X.: China GDP spatial distribution kilometer grid dataset, *Resour. Environ. Sci. Data Center*, doi:10.12078/2017121102, 2017.
- 540 Xu, X.: China population spatial distribution kilometer grid dataset, *Resour. Environ. Sci. Data Center*, doi:10.12078/2017121101, 2017.
- Yang, J., and Huang, X.: The 30 m annual land cover dataset and its dynamics in China from 1990 to 2019, *Earth Syst. Sci. Data*, 13, 3907–3925, doi:10.5194/essd-13-3907-2021, 2021.
- Yasir, M., Sheng, H., and Fan, H.: Automatic coastline classification and changes analysis using remote sensing and GIS  
 545 technology, *IEEE Access*, 8, 180156–180170, doi:10.1109/ACCESS.2020.3027883, 2020.
- Yong, S. Y., O'Grady, J., and Gregory, R.: Regional-scale image segmentation of sandy beaches in southeastern Australia, *Remote Sens.*, 16, 3159, doi:10.3390/rs16183159, 2024.
- Zhang, H., Tian, P., and Zhong, J.: Mapping photovoltaic panels in coastal China using Sentinel-1 and Sentinel-2 images and Google Earth Engine, *Remote Sens.*, 15, 3739, doi:10.3390/rs15153739, 2023.
- 550 Zhang, L., Fang, C., and Zhao, R.: Spatial-temporal evolution and driving force analysis of eco-quality in urban agglomerations in China, *Sci. Total Environ.*, 866, 161465, doi:10.1016/j.scitotenv.2023.161465, 2023.
- Zhang, L., Li, G., and Liu, S.: Spatiotemporal variations and driving factors of coastline in the Bohai Sea, *J. Ocean Univ. China*, 21, 1517–1528, doi:10.1007/s11802-022-5148-4, 2022.
- Zhang, Q., Li, B., and Thau, D.: Building a better urban picture: Combining day and night remote sensing imagery, *Remote  
 555 Sens.*, 7, 11887–11913, doi:10.3390/rs70911887, 2015.
- Zhang, X., Liu, L., and Wu, C.: Development of a global 30 m impervious surface map using multisource and multitemporal remote sensing datasets with the Google Earth Engine platform, *Earth Syst. Sci. Data*, 12, 1625–1648, doi:10.5194/essd-12-1625-2020, 2020.
- Zhang, X., Xu, M., and Wang, S.: Mapping photovoltaic power plants in China using Landsat, random forest, and Google  
 560 Earth Engine, *Earth Syst. Sci. Data*, 14, 3743–3755, doi:10.5194/essd-14-3743-2022, 2022.



- Zhou, L., Yang, Y., and Li, G.: OSL dating of coastal dunes on the southeastern coast of Hainan Island, China, *Front. Mar. Sci.*, 10, 1180635, doi:10.3389/fmars.2023.1180635, 2023.
- Zhou, Y., Feng, X., and Liu, M.: Influence of beach erosion during wave action in designed artificial sandy beach using XBeach model: Profiles and shoreline, *J. Mar. Sci. Eng.*, 11, 934, doi:10.3390/jmse11050934, 2023.
- 565 Zhu, Y., Li, Z., and Zhao, Z.: Spatio-temporal changes of coastline in Jiaozhou Bay from 1987 to 2022 based on optical and SAR data, *Front. Mar. Sci.*, 10, 1206576, doi:10.3389/fmars.2023.1206576, 2023.
- Zou, Z., Xiao, X., and Dong, J.: Divergent trends of open-surface water body area in the contiguous United States from 1984 to 2016, *Proc. Natl. Acad. Sci. U. S. A.*, 115, 3810–3815, doi:10.1073/pnas.1719275115, 2018.
